# Supplementary material for: Unique Digoldgermanes: Structural Characteristics, Dynamic Behaviour and Distinctive Reactions
Source: Research Square preprint supplement (doi:10.21203/rs.3.rs-929227/v1), 2021-10-12
Supplement: Supplementary file 1 [file d1dbe51220fd7ab6b6be0986.docx]

**Supplementary Information**

**For**

**Unique Digoldgermanes: Structural Characteristics, Dynamic Behaviour and Distinctive Reactions**

Liliang Wang, Guorong Zhen, Yinhuan Li, Mitsuo Kira*, Xiao-Yong Chang*, Liping Yan, Lu Huang, and Zhifang Li*

**Table of Contents**

[Experimental Section 2](#_Toc82680849)

[**a)** VT NMR spectra and chemical shift of **3b** 2](#_Toc82680850)

[**b)** Crystallographic details 4](#_Toc82680851)

[**c)** UV-visible spectroscopy 10](#_Toc82680852)

[**d)** 1H, 13C, 29Si and 31P Spectra of products 11](#_Toc82680853)

[Theoretical calculations 34](#_Toc82680854)

# Experimental Section


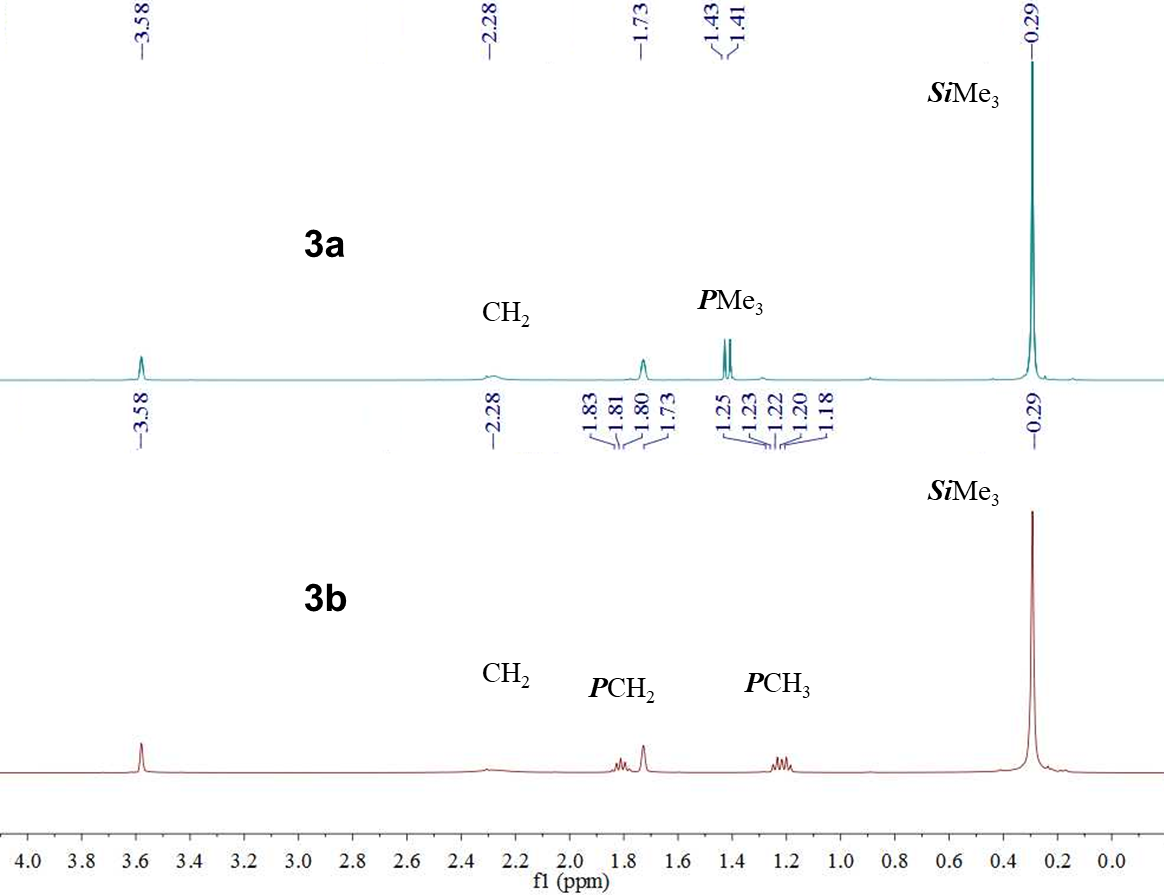


**Figure S1.** 1H NMR spectra of **3a** (top) and **3b** (bottom) in THF-*d8* at room temperature.

## VT NMR spectra and chemical shift of **3b**

The 1H NMR spectra of **3b** were recorded in THF-*d*8 (0.018 M). Peak positions were picked by fitting in MestReNova software.


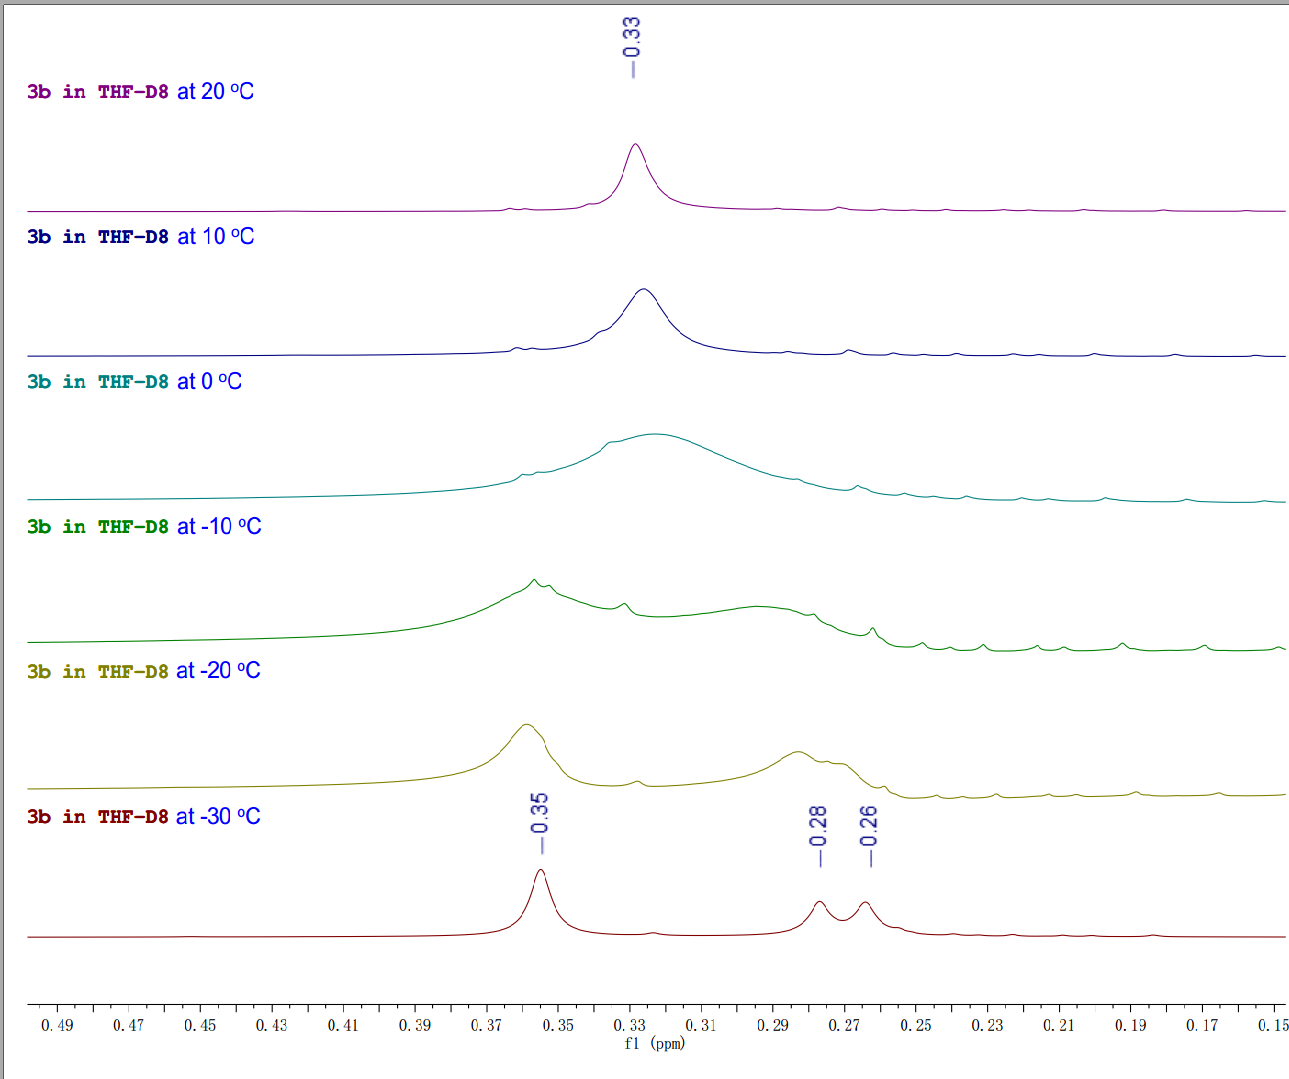


**Figure S2.** 1H NMR spectra of **3b** at variable temperatures from 20 ºC to –30 ºC.

**Scheme S1.** Reaction of dialkylgermylene **1** with Ph4PCl.

**Scheme S2.** Proposed reaction pathway for the formation of **9**.

**Scheme S3.**Cyclic trimerization of aryl isocyanates **10** catalyzed by digoldgermane **3a**.

**Mechanistic proposal for the cyclotrimerization of aryl isocyanates**

**Figure S3.** A catalytic cycle proposed for a cyclic trimerization of aryl isocyanates catalyzed by **3a**.

## Crystallographic details

X-ray data collection and structural refinement. Intensity data for compounds **2b**, **3a, 3b**, **4, 5,** **7** and **9** were collected using a Bruker APEX II diffractometer. The structure was solved by direct phase determination (SHELX-2014) and refined for all data by full-matrix least-squares methods on *F2*. S1,S2 All non-hydrogen atoms were subjected to anisotropic refinement. The hydrogen atoms were located at calculated positions or found in the *F*map. CCDC: 2040233, 2040232, 2040235, 2040234, 2093574, 2040236 and 2093575 contains the supplementary crystallographic data for this paper. The data can be obtained free of charge from the Cambridge Crystallography Data Center via [www.ccdc.cam.ac.uk/data_reCquest/cif](http://www.ccdc.cam.ac.uk/data_request/cif).

**Table S1.** X-ray data for **2b**, **3a**, **3b, 4,** **5, 7** and **9**.

| Compounds | **2b** | **3a** | **3b** |
| --- | --- | --- | --- |
| Formula | C22H55AuClGePSi4 | C35H89Au2Ge2PSi8 | C38H95Au2Ge2PSi8 |
| Fw | 767.99 | 1304.86 | 1346.94 |
| Crystsyst | Triclinic | Triclinic | Monoclinic |
| Space group | P-1 | P-1 | P21/n |
| Size (mm3) space group | 0.21 x 0.15 x 0.15 | 0.36×0.35×0.29 | 0.25 × 0.25 × 0.20 |
| T/K | 296(2) | 100.04 | 140(2) |
| *a,* Å | 9.9896(5) | 11.3169(6) | 16.7554(8) |
| *b*, Å | 11.5379(6) | 13.4458(10) | 18.3718(9) |
| *c*, Å | 16.6794(9) | 19.2778(14) | 18.6768(8) |
| α, deg | 71.5790(10) | 83.444(2) | 90 |
| β, deg | 84.8400(10) | 79.181(2) | 98.4697(12) |
| γ, deg | 67.2130(10) | 70.518(2) | 90 |
| V, A3 | 1680.43(15) | 2712.1(3) | 5686.5(5) |
| Z | 2 | 2 | 4 |
| *d* calcdg·cm-3 | 1.518 | 1.598 | 1.573 |
| μ, mm-1 | 5.534 | 6.719 | 6.411 |
| Refl collected | 34666 | 48541 | 65807 |
| Nmeasd | 8364 | 16706 | 13544 |
| [R int] | 0.0346 | 0.0612 | 0.0602 |
| R [I>2sigma(I)] | 0.0336 | 0.0386 | 0.0489 |
| Rw [I>2sigma(I)] | 0.0925 | 0.0951 | 0.1106 |
| GOF | 1.032 | 1.013 | 1.034 |
| Largest diff. peak/ hole [e. Å-3] | 0.957 and -1.529 | 2.71 and -1.87 | 9.306 and -1.674 |

| Compounds | **4** | **5** |
| --- | --- | --- |
| Formula | Au2C22GeH58P2Si4 | C33H83AuGe2Si8 |
| Fw | 946.16 | 1046.86 |
| Crystsyst | tetragonal | monoclinic |
| Space group | I41/acd | Cc |
| Size (mm3) space group | 0.31 × 0.25 × 0.18 | 0.34 × 0.31 × 0.24 |
| T/K | 100 | 100 |
| *a,* Å | 22.2649(7) | 23.1510(12) |
| *b*, Å | 22.2649(7) | 16.8799(9) |
| *c*, Å | 34.6740(16) | 12.6367(7) |
| α, deg | 90 | 90 |
| β, deg | 90 | 96.917(2) |
| γ, deg | 90 | 90 |
| V, A3 | 17188.8(13) | 4902.3(5) |
| Z | 16 | 4 |
| *d* calcdg·cm-3 | 1.756 | 1.418 |
| μ, mm-1 | 15.335 | 4.420 |
| Refl collected | 52505 | 66852 |
| Nmeasd | 9056 | 15149 |
| [R int] | 0.0907 | 0.0587 |
| R [I>2sigma(I)] | 0.0658 | 0.0434 |
| Rw [I>2sigma(I)] | 0.0669 | 0.0844 |
| GOF | 1.142 | 1.053 |
| Largest diff. peak/ hole [e. Å-3] | 4.63 and -1.96 | 1.32 and -0.81 |

| Compounds | **7** | **9** |
| --- | --- | --- |
| Formula | C59H109Au2ClGe2P2Si8 | C32H80AuClGe2Si8 |
| Fw | 1679.68 | 1067.27 |
| Crystsyst | Monoclinic | monoclinic |
| Space group | P21/n | P21/n |
| Size (mm3) space group | 0.15 × 0.15 × 0.12 | 0.14 × 0.12 × 0.08 |
| T/K | 150 | 150 |
| *a,* Å | 11.4018(10) | 15.6807(10) |
| *b*, Å | 28.876(3) | 19.0646(15) |
| *c*, Å | 22.400(2) | 17.9997(11) |
| α, deg | 90 | 90 |
| β, deg | 92.372(2) | 114.697(2) |
| γ, deg | 90 | 90 |
| V, A3 | 7368.7(12) | 4888.7(6) |
| Z | 4 | 4 |
| *d* calcdg·cm-3 | 1.514 | 1.450 |
| μ, mm-1 | 5.020 | 9.508 |
| Refl collected | 62304 | 44666 |
| Nmeasd | 19836 | 8968 |
| [R int] | 0.0671 | 0.0830 |
| R [I>2sigma(I)] | 0.0392 | 0.0621 |
| Rw [I>2sigma(I)] | 0.0847 | 0.1547 |
| GOF | 1.00 | 1.078 |
| Largest diff. peak/ hole [e. Å-3] | 1.68 and -1.38 | 8.41 and -2.63 |


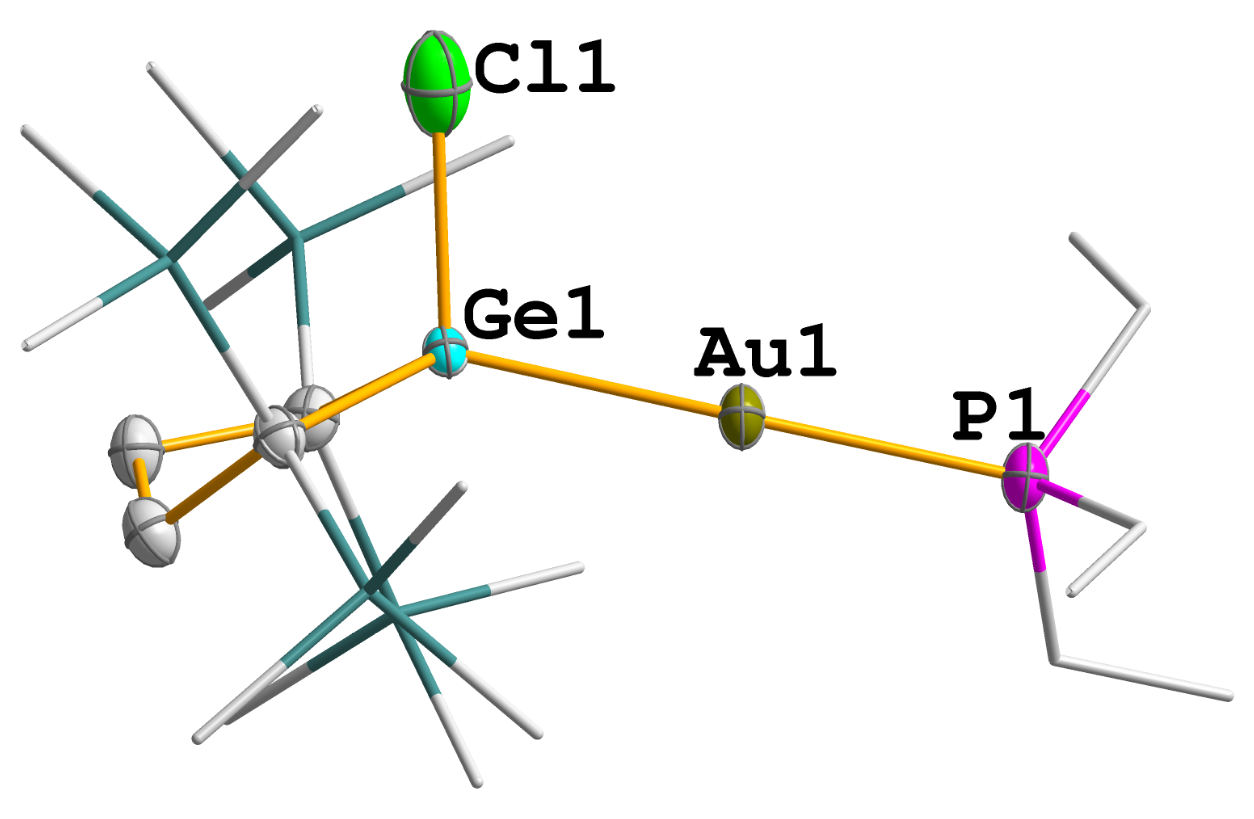


**Figure S4.** Solid structure of **2b**. Thermal ellipsoids are shown at the 30% probability level. Hydrogen atoms are omitted for clarity. Trimethylsilyl, ethyl, and methyl groups are depicted in a wireframe model. Selected bond lengths [Å] and angles [º]: Au(1)-P(1) 2.3218(12), Au(1)-Ge(1) 2.4160(4), Cl(1)-Ge(1) 2.136(5), Ge(1)-C(4) 2.013(4), Ge(1)-C(1) 2.014(4); P(1)-Au(1)-Ge(1) 174.39(4), C(4)-Ge(1)-C(1) 95.72(15), Cl(1)-Ge(1)-Au(1) 104.31(9).


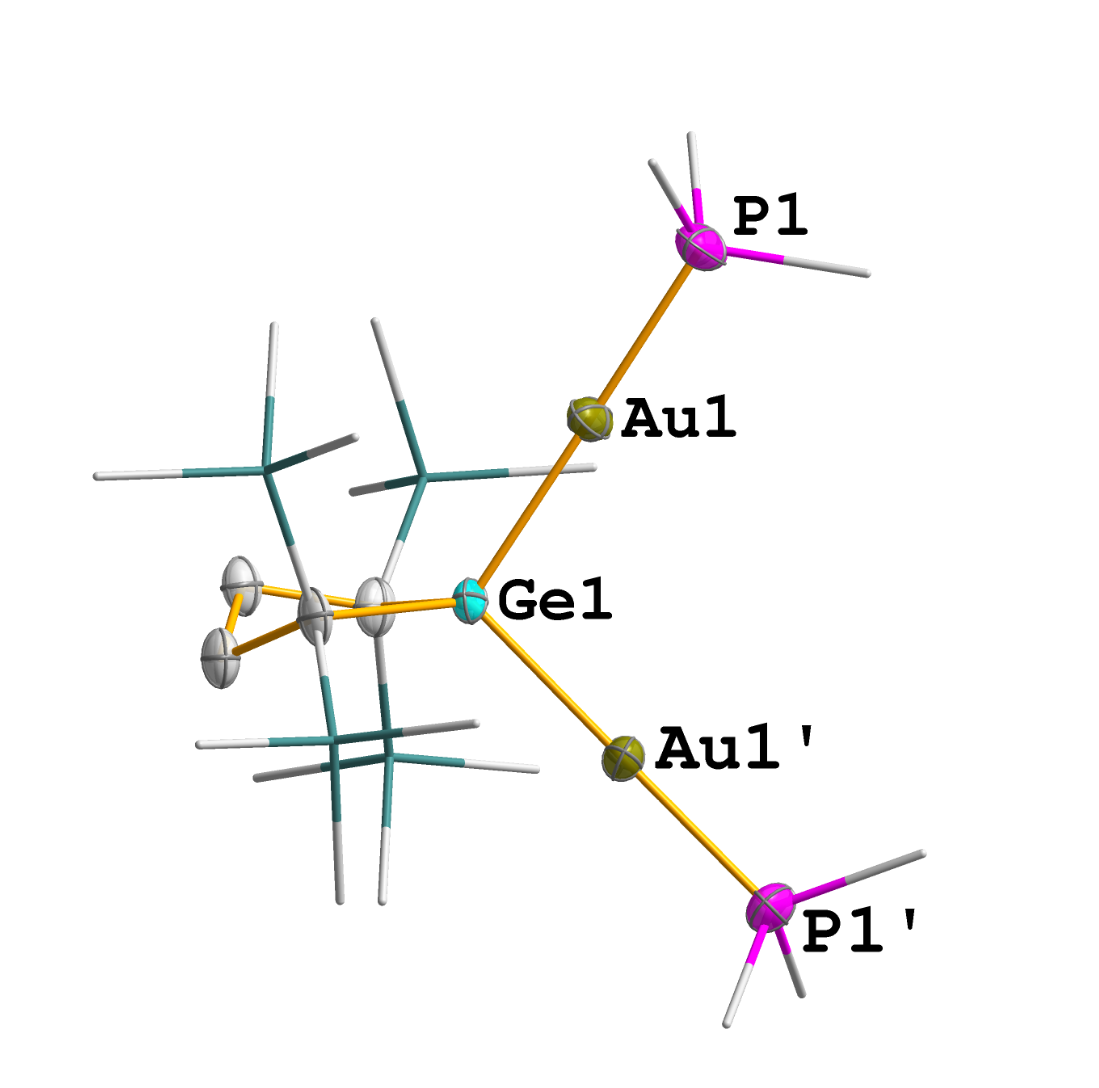


**Figure S5.** Solid structure of **4**. Thermal ellipsoids are shown at the 30% probability level. Hydrogen atoms are omitted for clarity. Trimethylsilyl, ethyl, and methyl groups are depicted in a wireframe model. Selected bond lengths [Å] and angles [º]: Au(1)-Ge(1) 2.4211(6), Au(1)-P(1) 2.302(5), Au(1’)-P(1’) 2.302(5); P(1)-Au(1)-Ge(1) 177.21(16), P(1’)-Au(1’)-Ge(1) 166.8(2), Au(1)-Ge(1)-Au(1’) 100.90(4).

## UV-visible spectroscopy


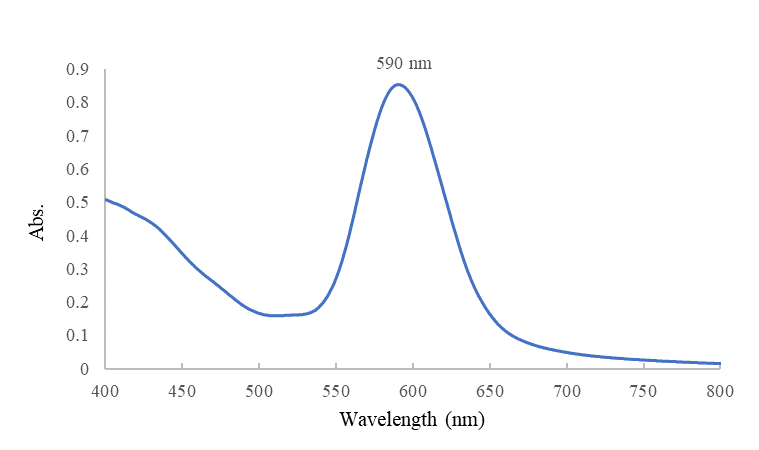


**Figure S6.** UV-visible spectrum of compound **3a** in THF (ε = 3558 M–1•cm–1)


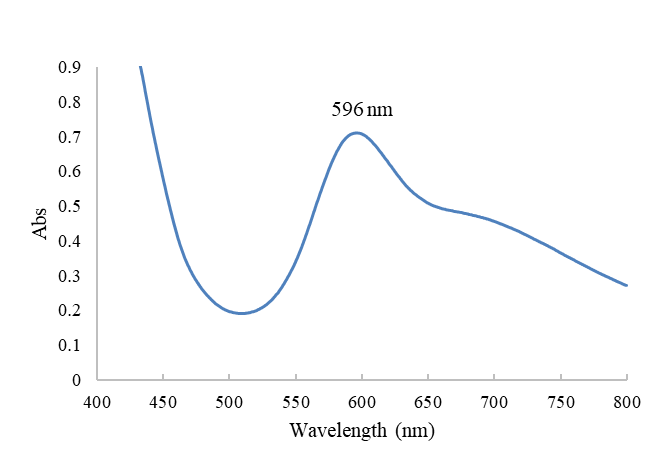


**Figure S7.** UV-visible spectrum of compound **3b** in THF (ε = 3556 M–1•cm–1)

## 1H, 13C, 29Si and 31P Spectra of products


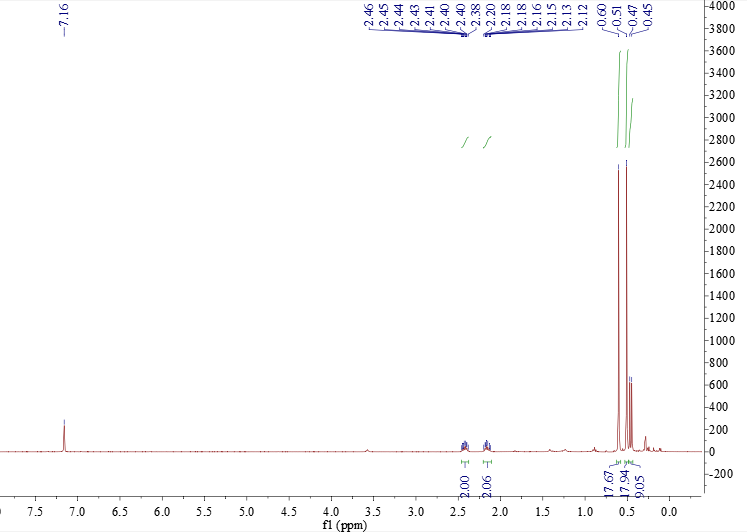


**Figure S8.** 1H NMR spectrum of **2a** in benzene-*d***6**


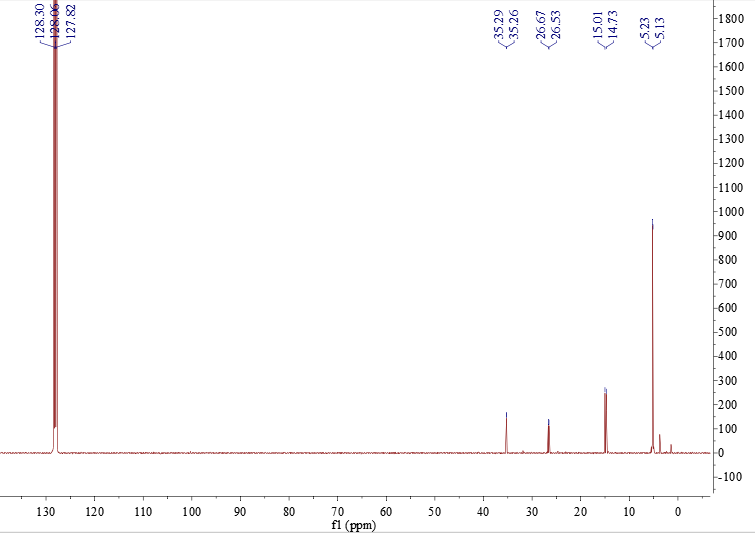


**Figure S9.** 13C NMR spectrum of **2a** in benzene-*d***6**


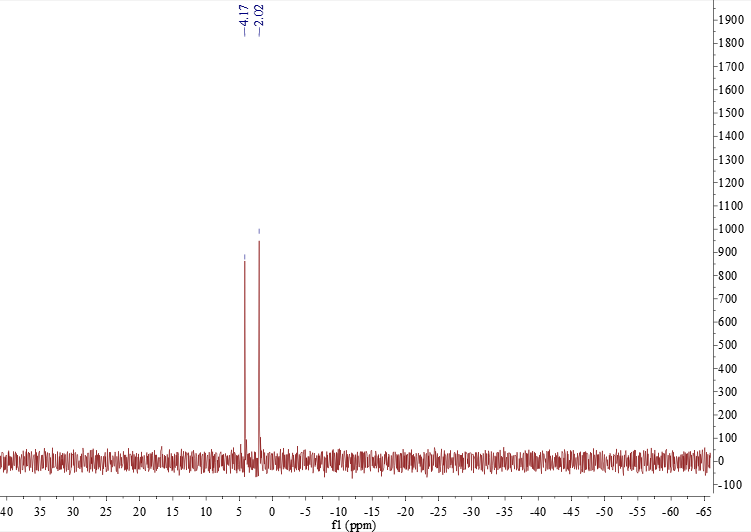


**Figure S10.** 29Si NMR spectrum of **2a** in benzene-*d***6**


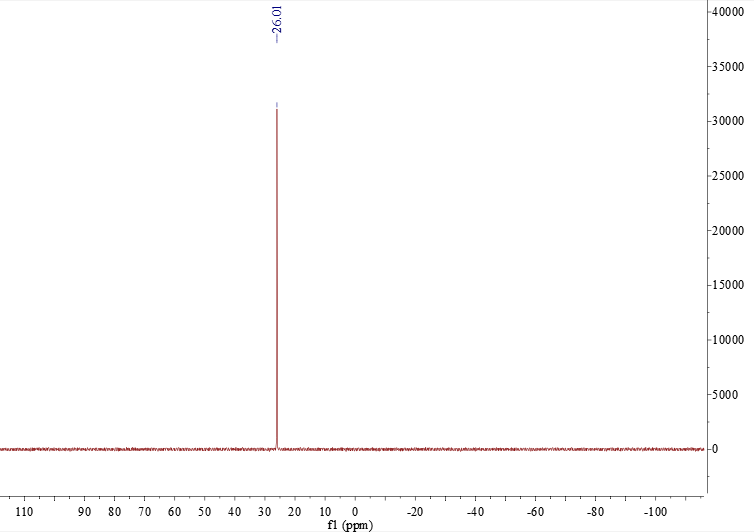


**Figure S11.** 31P NMR spectrum of **2a** in benzene-*d***6**


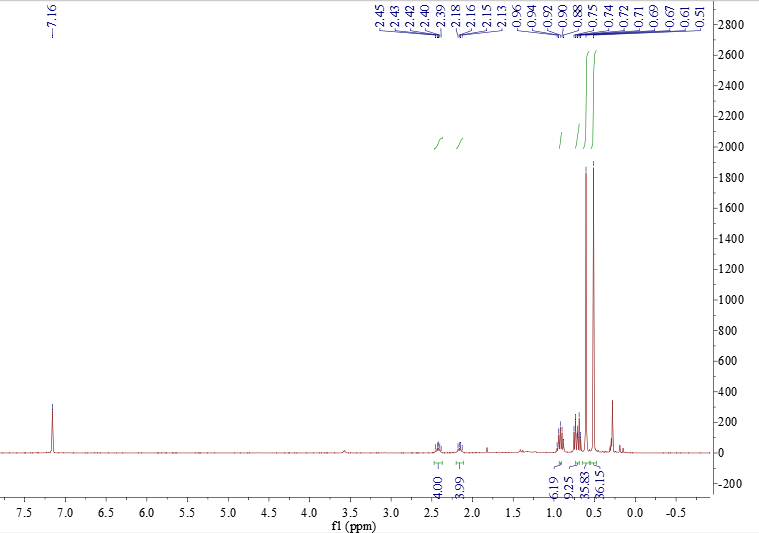


**Figure S12.** 1H NMR spectrum of **2b** in benzene-*d***6**


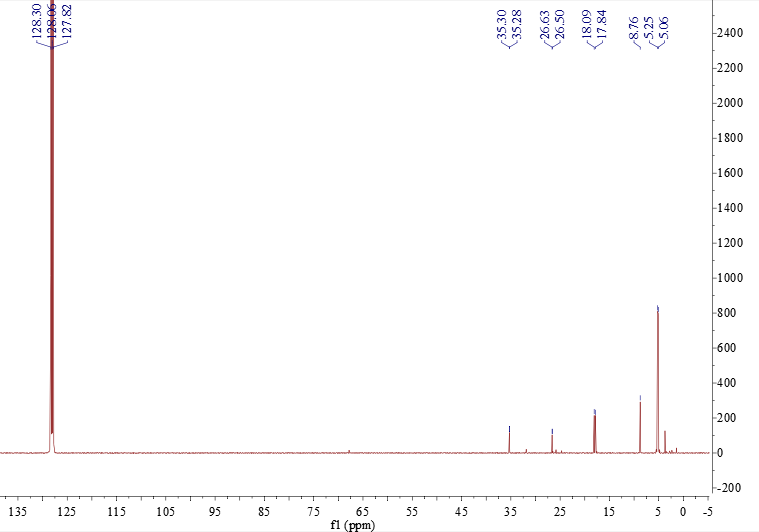


**Figure S13.** 13C NMR spectrum of **2b** in benzene-*d***6**


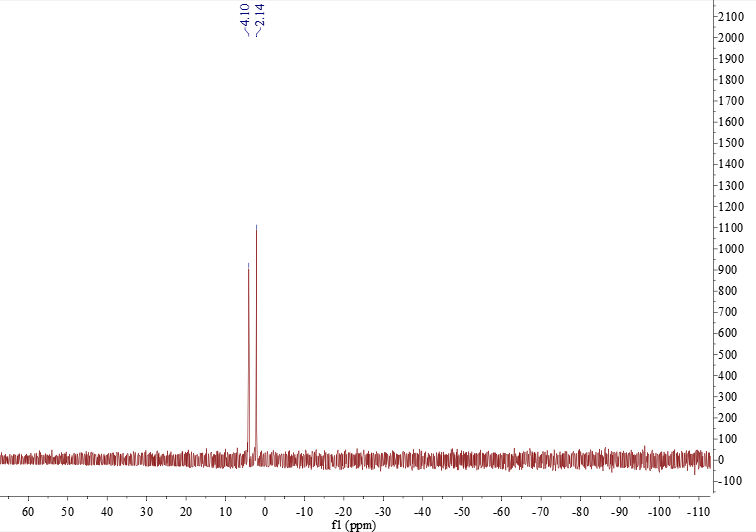


**Figure S14.** 29Si NMR spectrum of **2b** in benzene-*d***6**


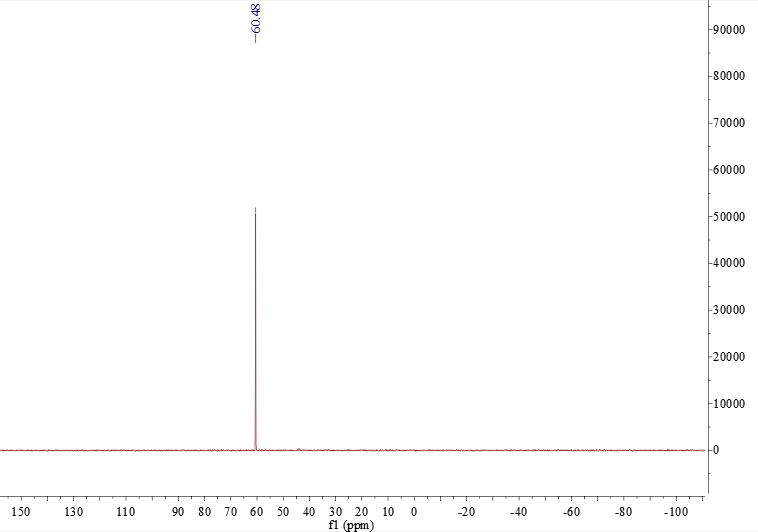


**Figure S15.** 31P NMR spectrum of **2b** in benzene-*d***6**


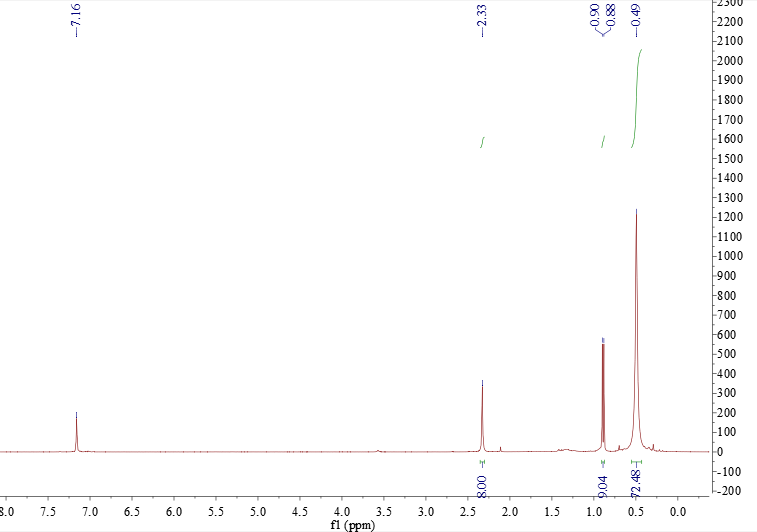


**Figure S16.** 1H NMR spectrum of **3a** in benzene-*d***6**


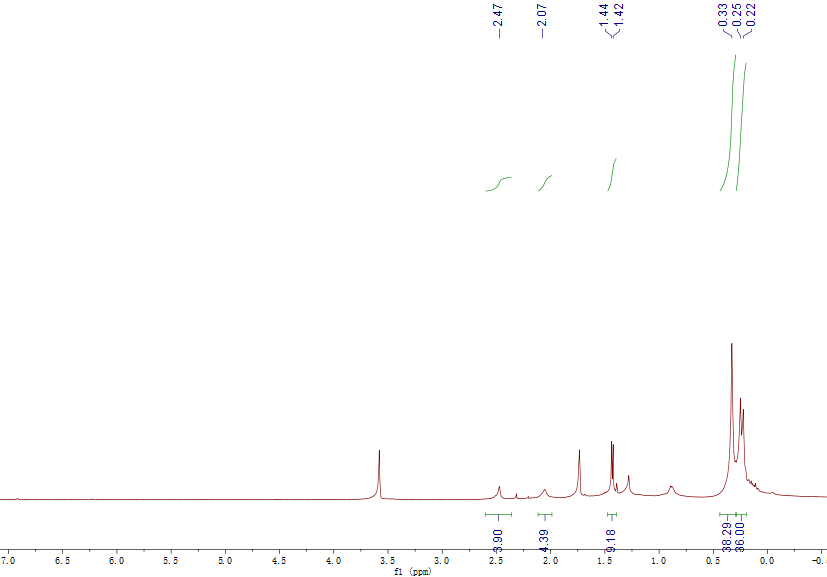


**Figure S17.** 1H NMR spectrum of **3a** in THF-*d8* at –30ºC


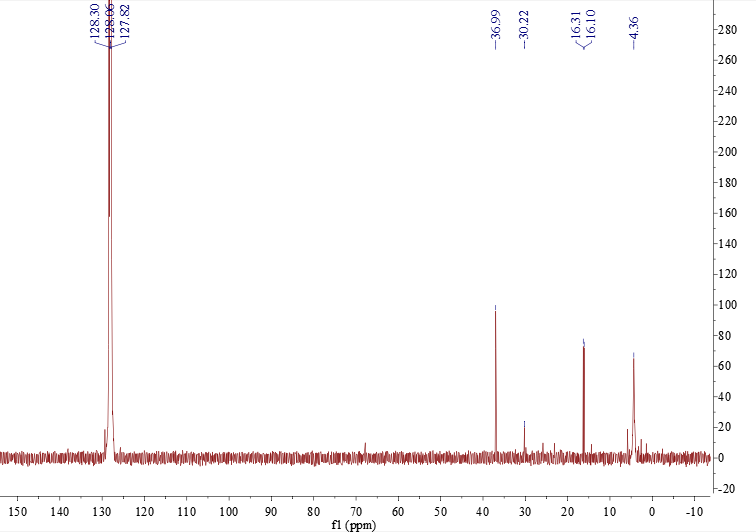


**Figure S18.** 13C NMR spectrum of **3a** in benzene-*d***6**


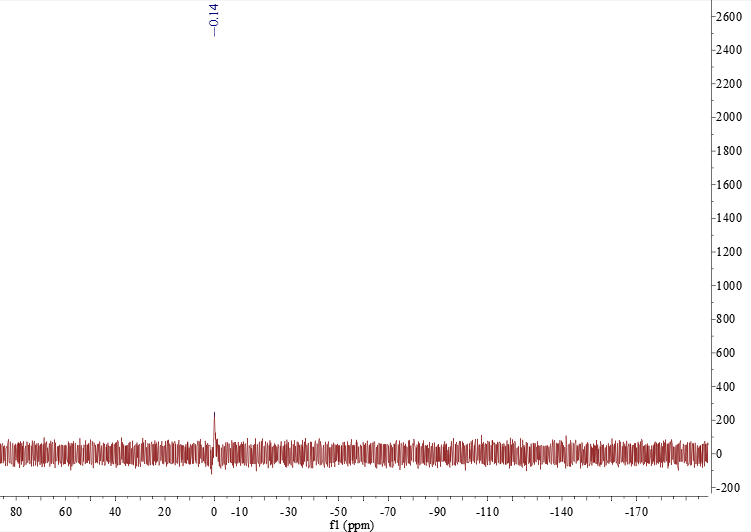


**Figure S19.** 29Si NMR spectrum of **3a** in benzene-*d***6**


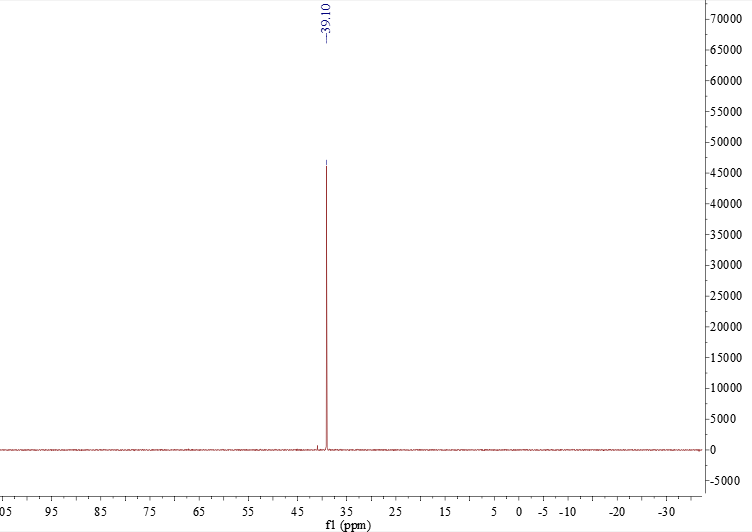


**Figure S20.** 31P NMR spectrum of **3a** in benzene-*d***6**


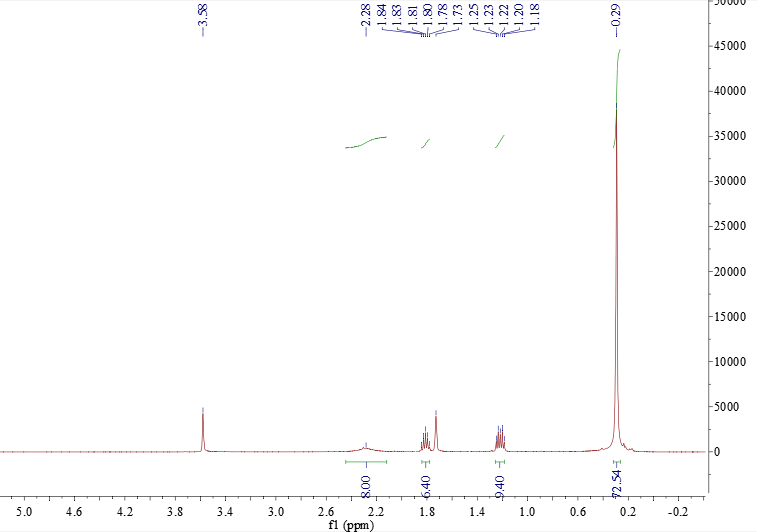


**Figure S21.** 1H NMR spectrum of **3b** in THF-*d*8


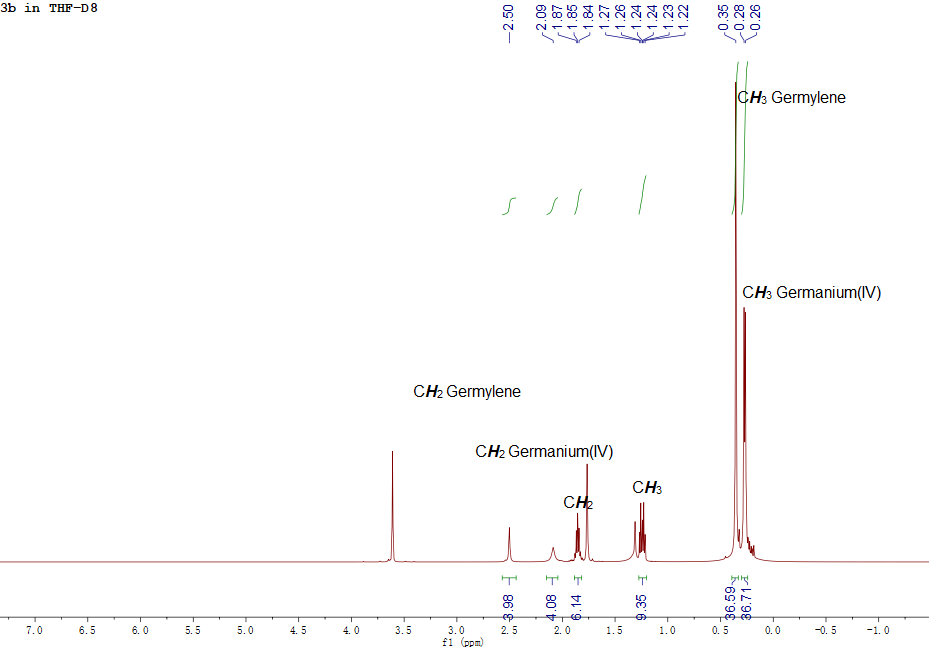


**Figure S22.** 1H NMR spectrum of **3b** in THF-*d*8 at –30 oC


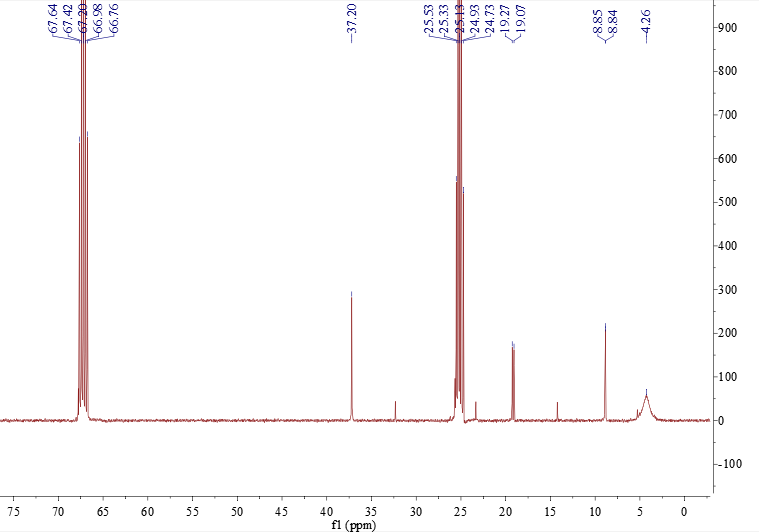


**Figure S23.** 13C NMR spectrum of **3b** in THF-*d*8


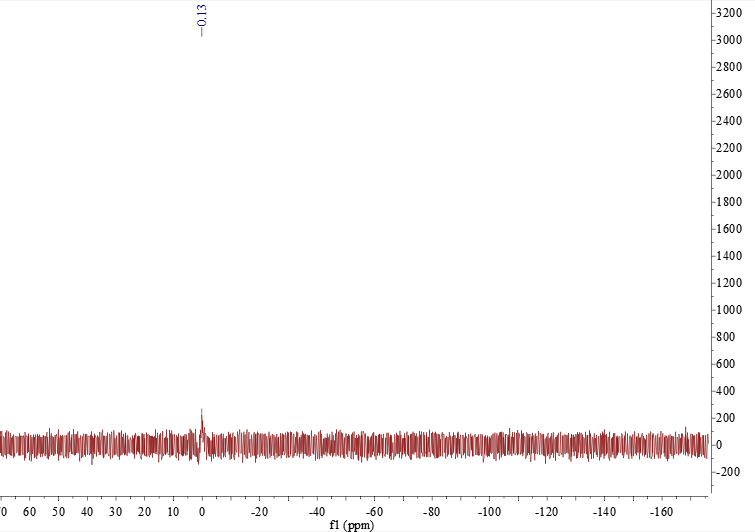


**Figure S24.** 29Si NMR spectrum of **3b** in THF-*d*8


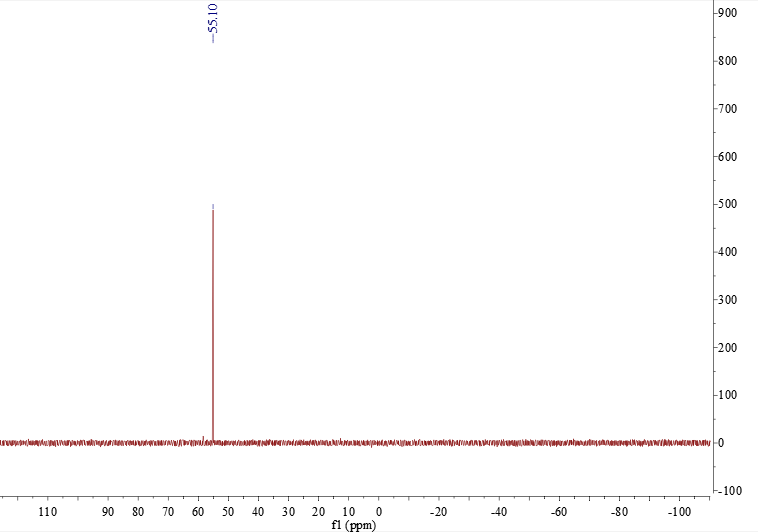


**Figure S25.** 31P NMR spectrum of **3b** in THF-*d*8


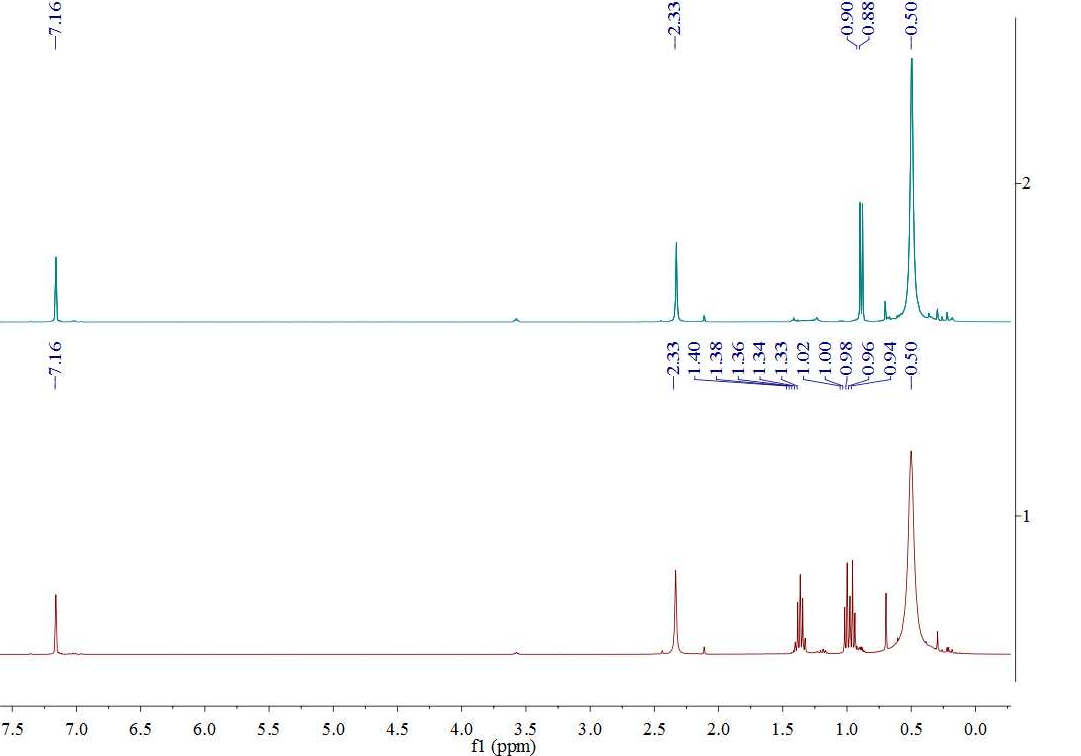


**Figure S26.** 1H NMR spectra of **3a** and **3b** in C6D6


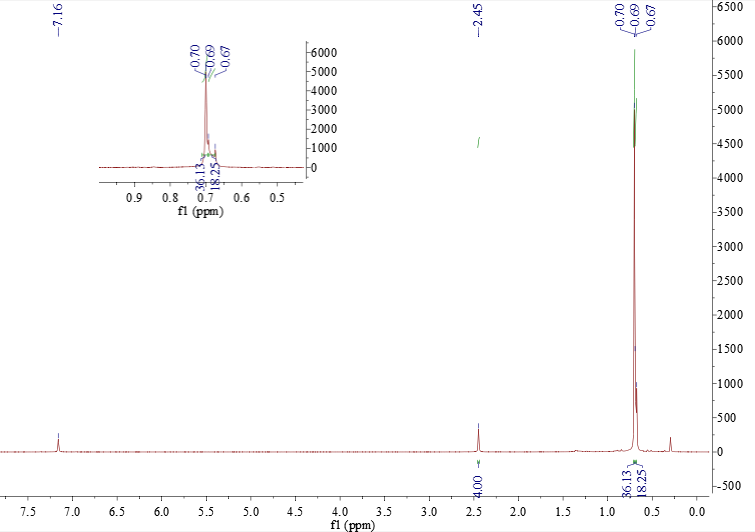


**Figure S27.** 1H NMR spectrum of **4** in C6D6


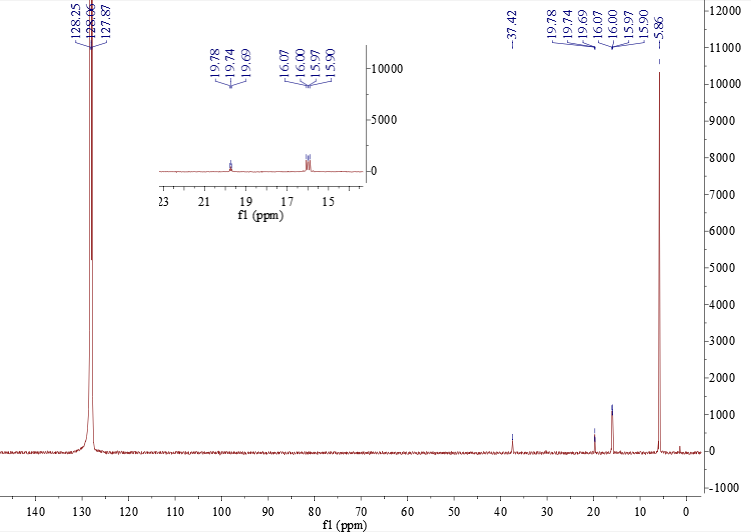


**Figure S28.** 13C NMR spectrum of **4** in C6D6


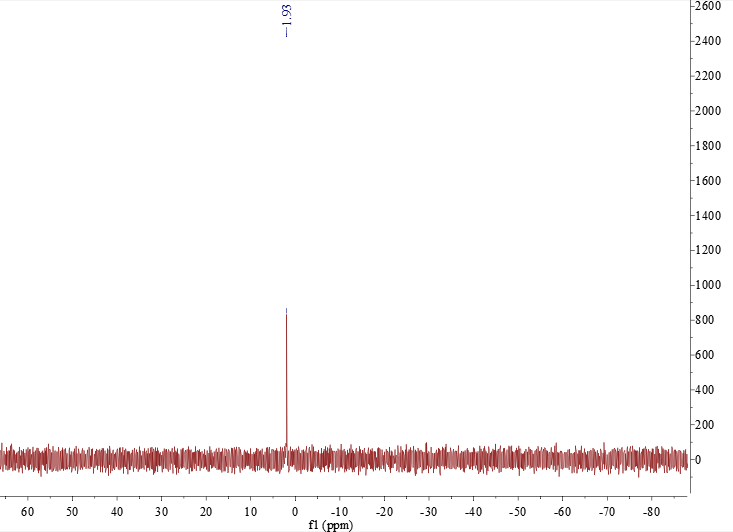


**Figure S29.** 29Si NMR spectrum of **4** in C6D6


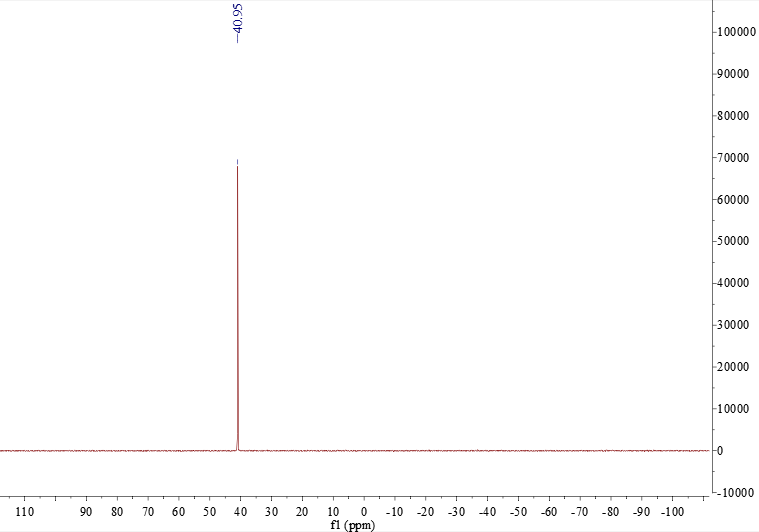


**Figure S30.** 31P NMR spectrum of **4** in C6D6


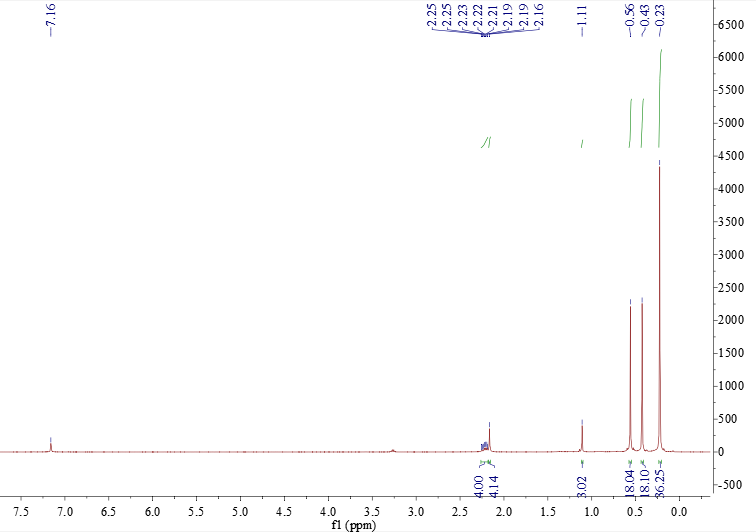


**Figure S31.** 1H NMR spectrum of **5**


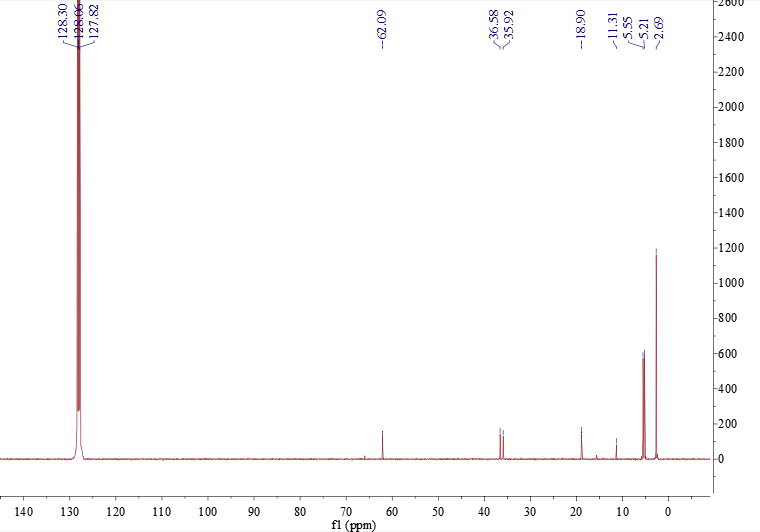


**Figure S32.** 13C NMR spectrum of **5**


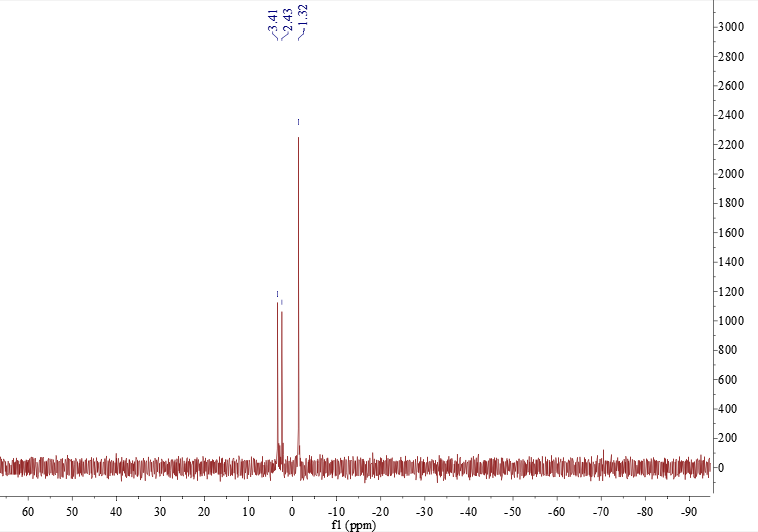


**Figure S33.** 29Si NMR spectrum of **5**


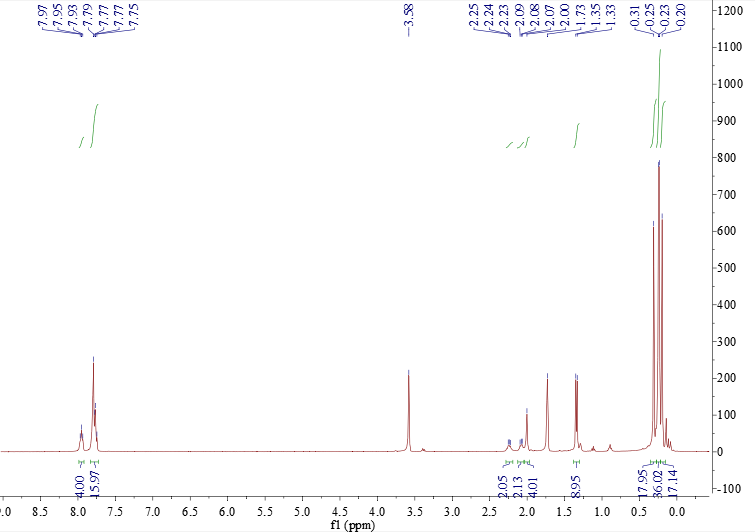


**Figure S34.** 1H NMR spectrum of **7** in THF-*d*8


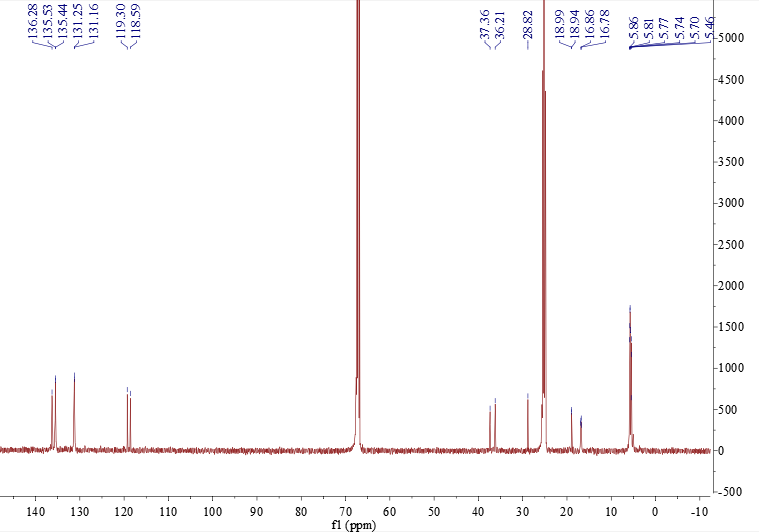


**Figure S35.** 13C NMR spectrum of **7** in THF-*d*8


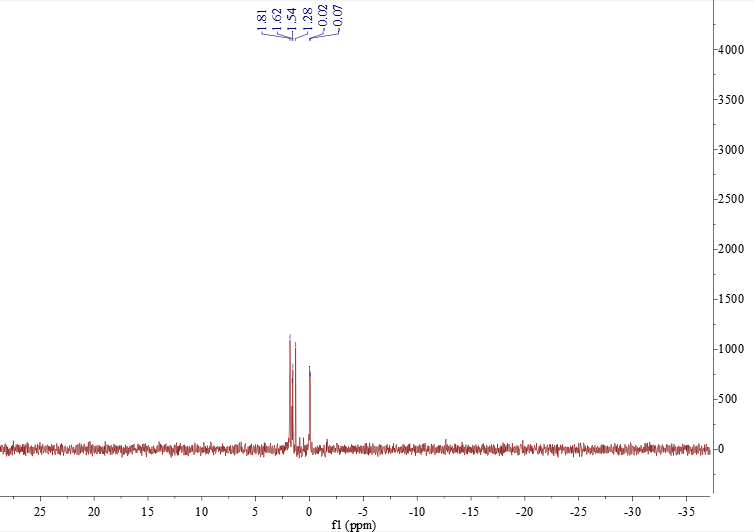


**Figure S36.** 29Si NMR spectrum of **7** in THF-*d*8


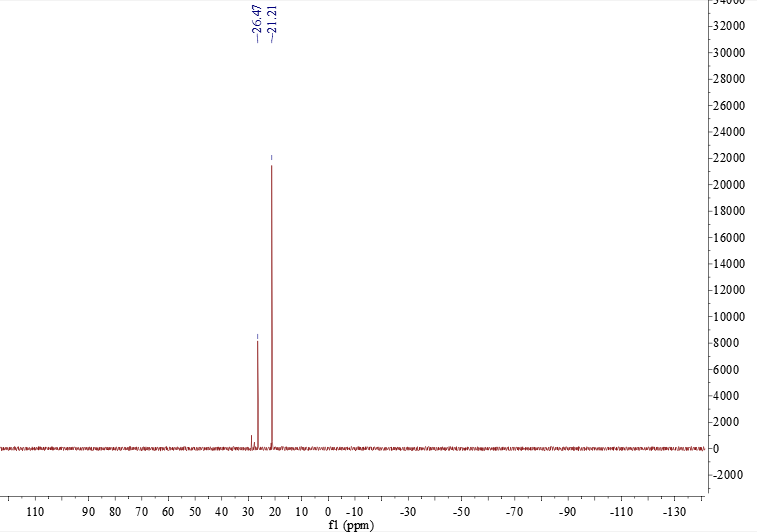


**Figure S37.** 31P NMR spectrum of **7** in THF-*d*8


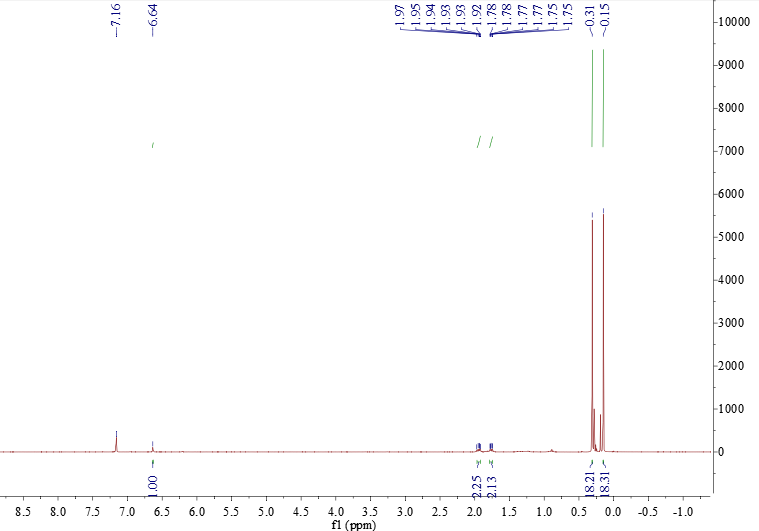


**Figure S38.** 1H NMR spectrum of **1•HCl** in C6D6


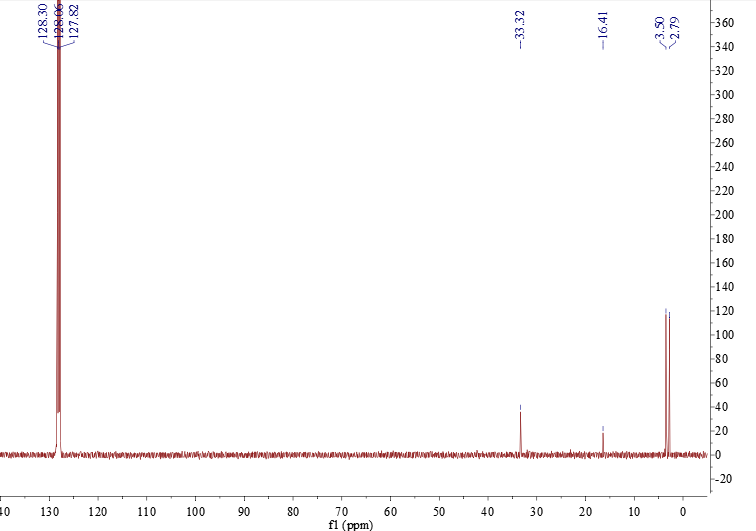


**Figure S39.** 13C NMR spectrum of **1•HCl** in C6D6


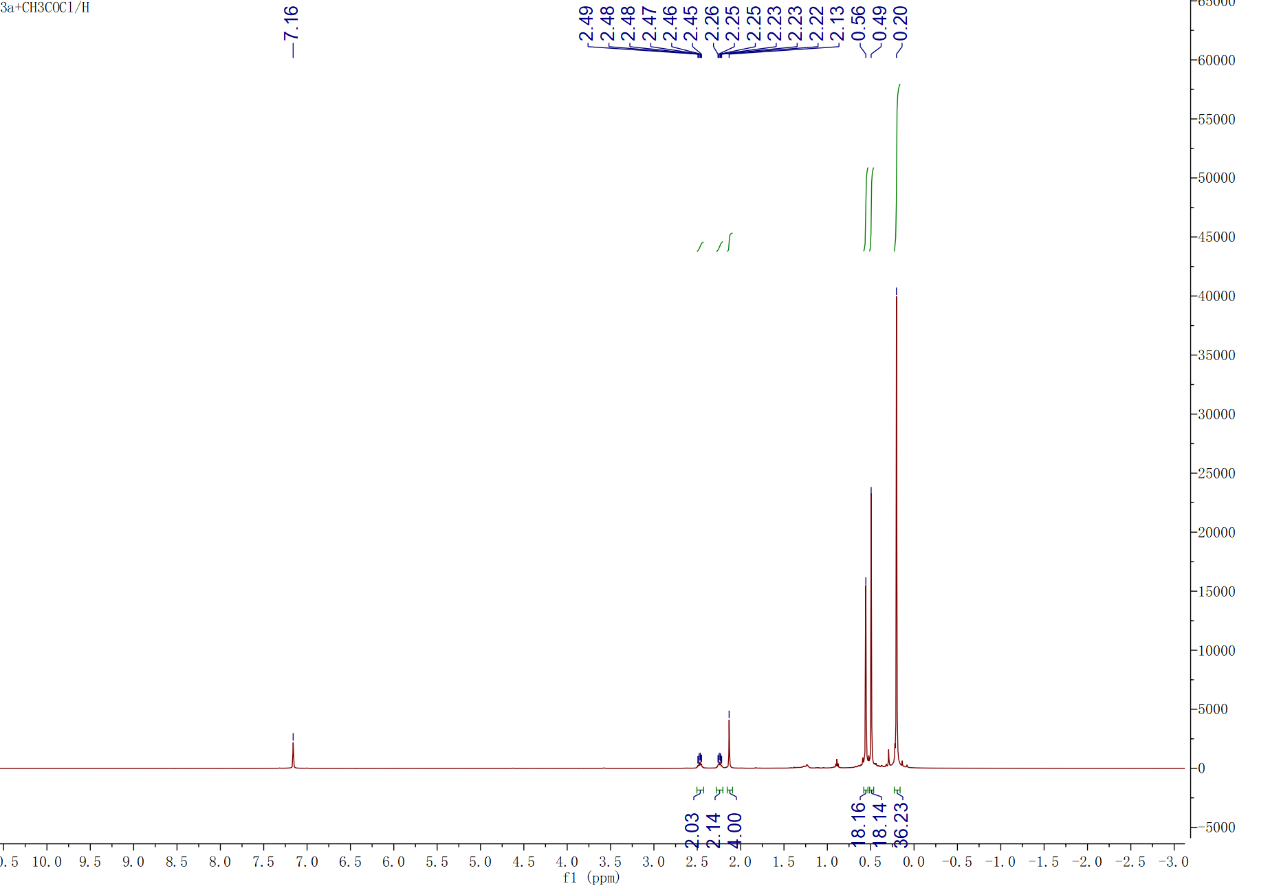


**Figure S40.** 1H NMR spectrum of **9** in C6D6


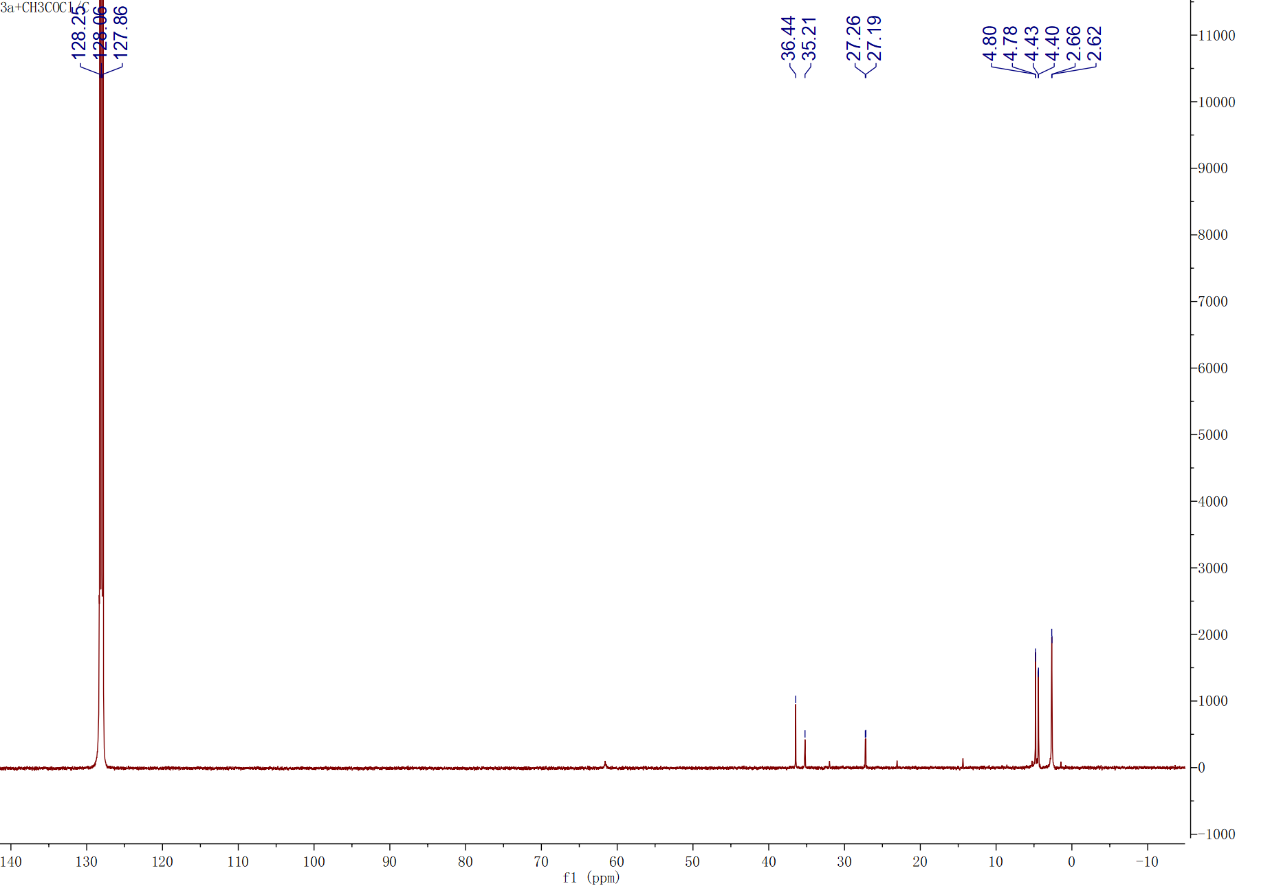


**Figure S41.** 13C NMR spectrum of **9** in C6D6


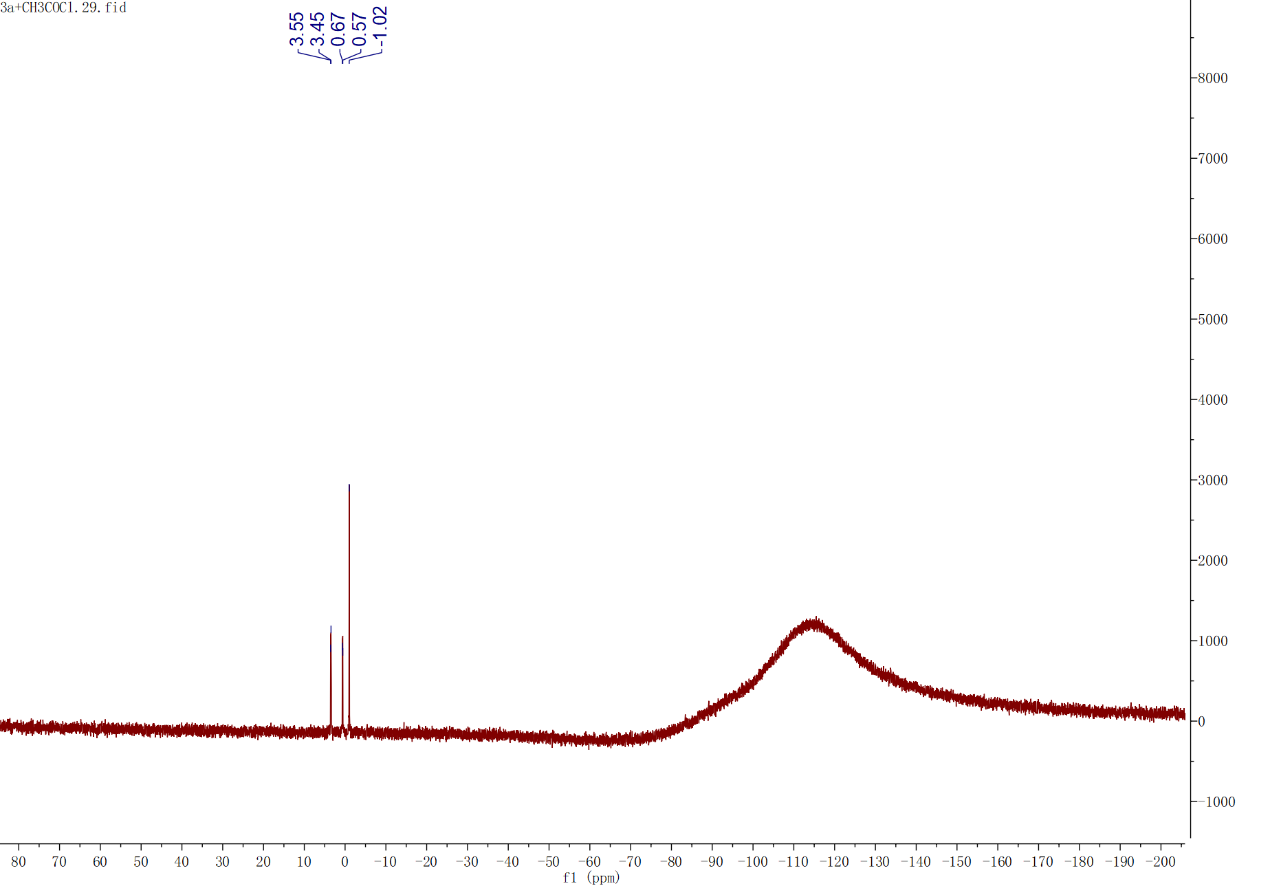


**Figure S42.** 29Si NMR spectrum of **9** in C6D6


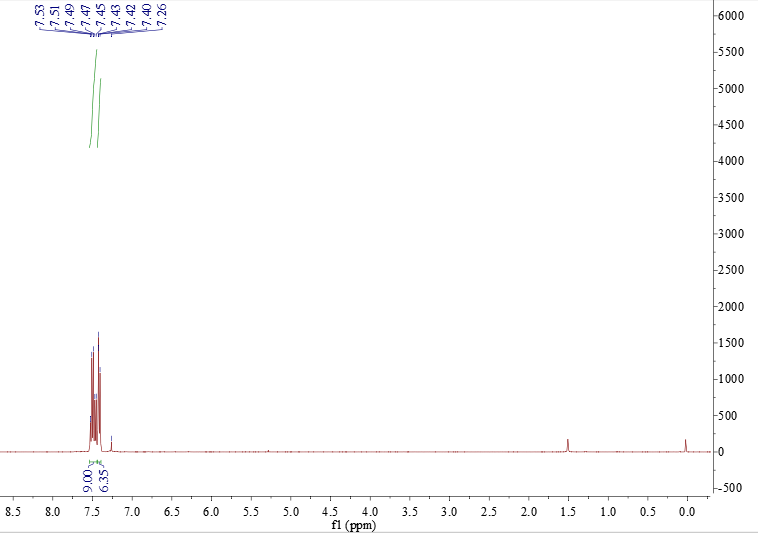


**Figure S43.** 1H NMR spectrum of **11a** in CDCl3


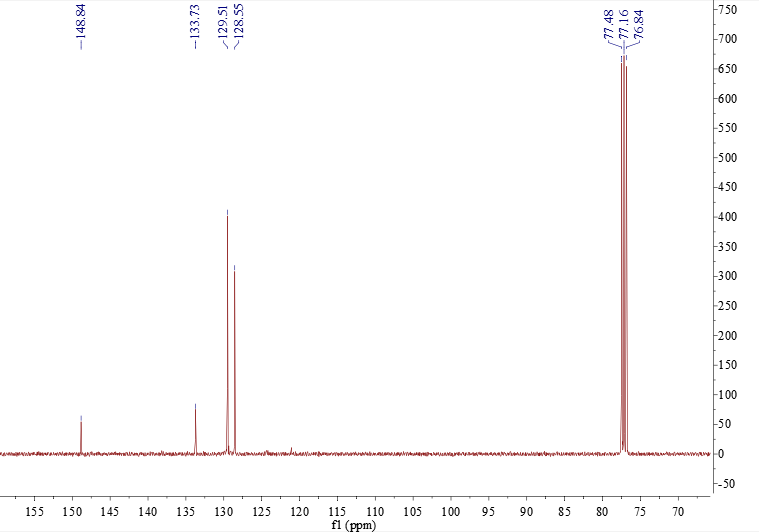


**Figure S44.** 13C NMR spectrum of **11a** in CDCl3


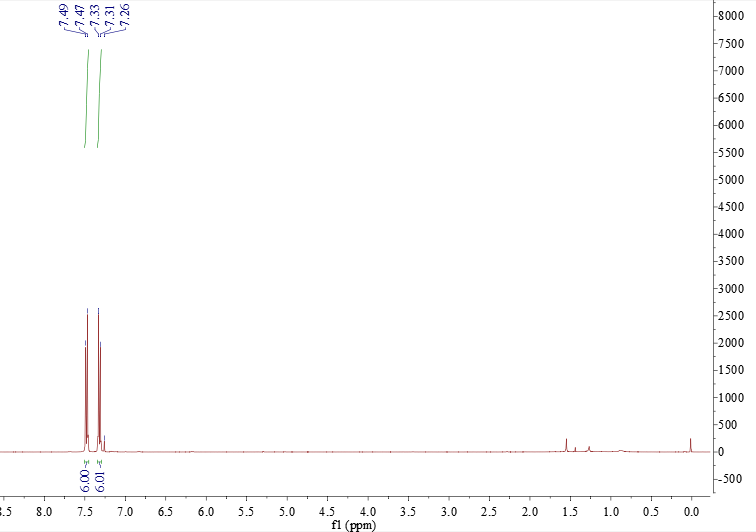


**Figure S45.** 1H NMR spectrum of **11b** in CDCl3


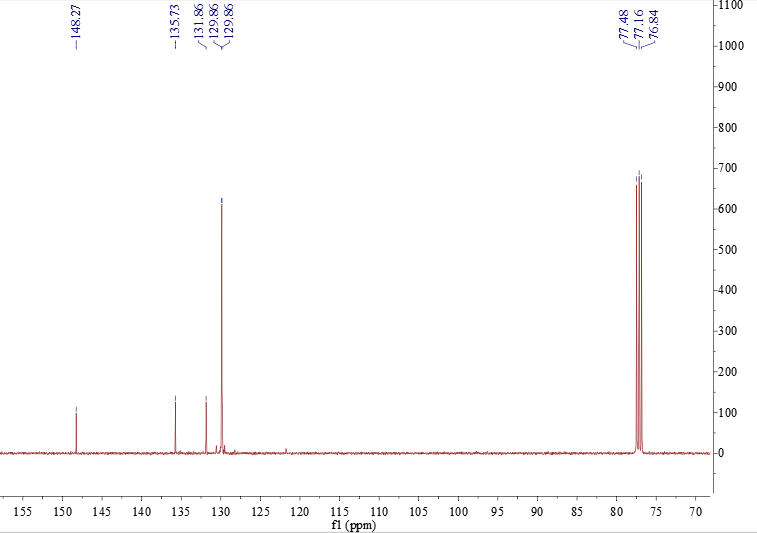


**Figure S46.** 13C NMR spectrum of **11b** in CDCl3


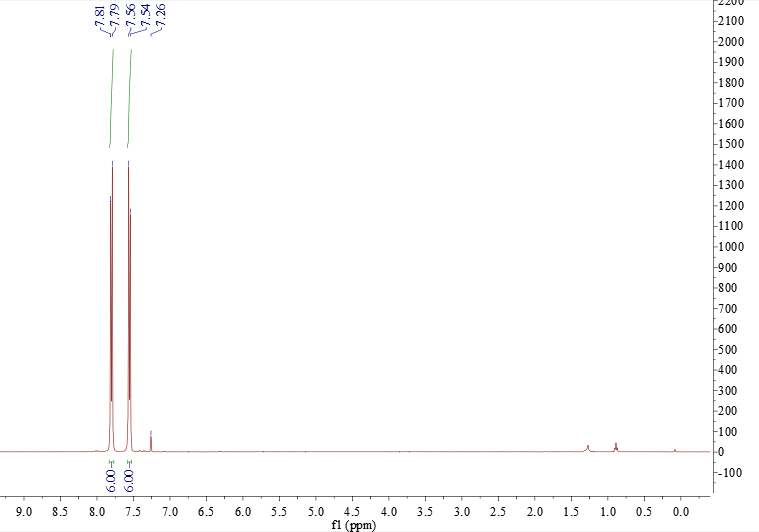


**Figure S47.** 1H NMR spectrum of **11c** in CDCl3


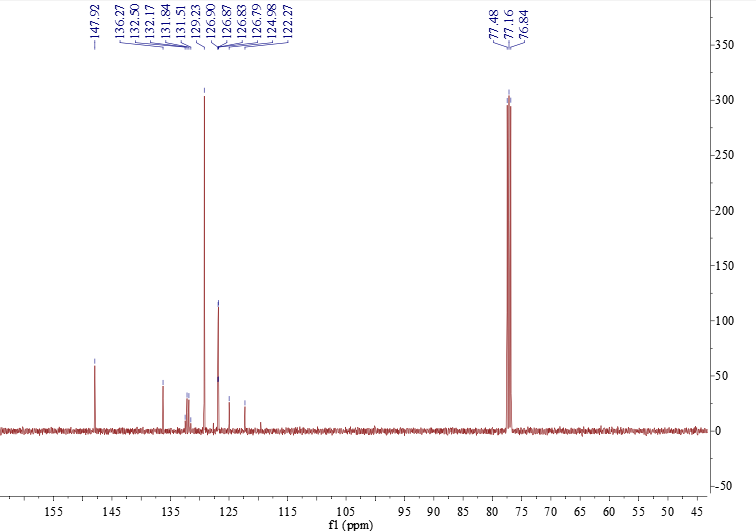


**Figure S48.** 13C NMR spectrum of **11c** in CDCl3


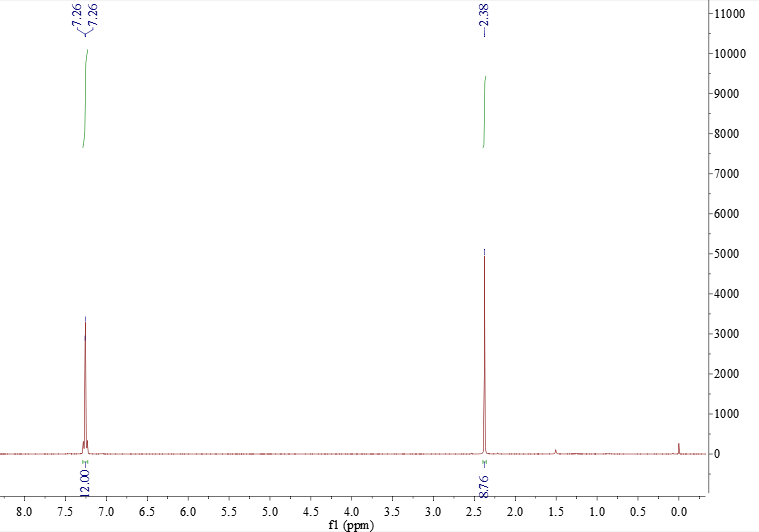


**Figure S49.** 1H NMR spectrum of **11d** in CDCl3


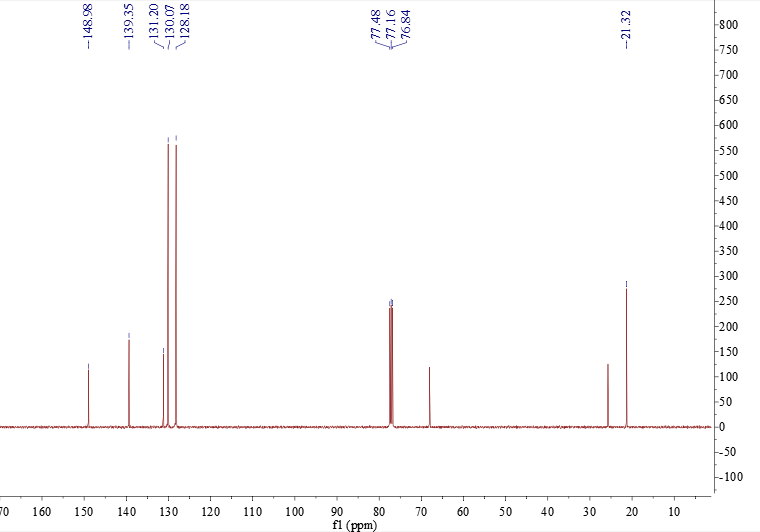


**Figure S50.** 13C NMR spectrum of **11d** in CDCl3


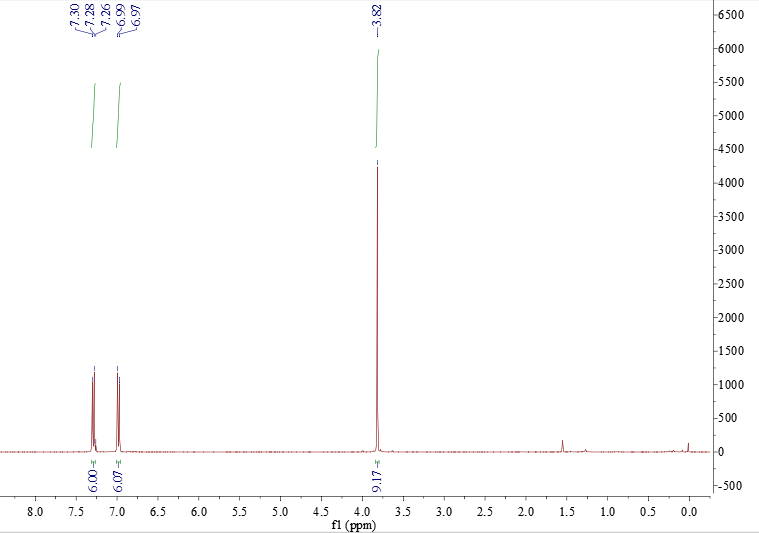


**Figure S51.** 1H NMR spectrum of **11e** in CDCl3


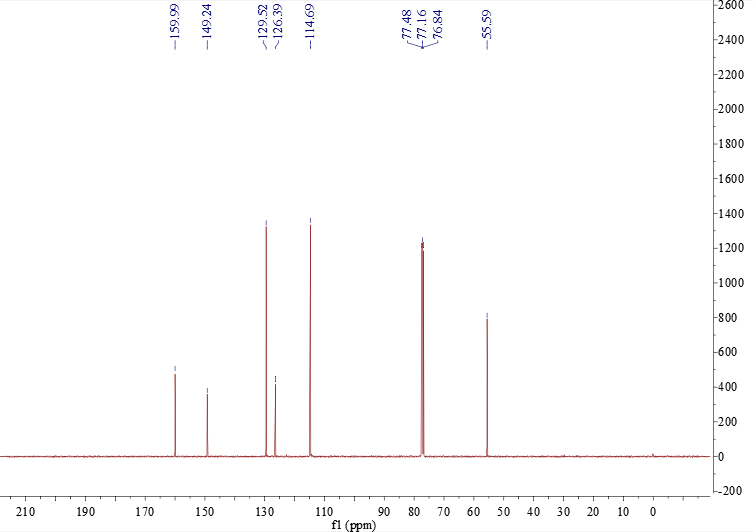


**Figure S52.** 13C NMR spectrum of **11e** in CDCl3

# Theoretical calculations

**Table S2.** Comparison of Structural Parameters between X-ray structure of **3** and Those Optimized at the B3PW91-GD3 Level

| Parameter | X-ray | | B3PW91 (**3a)** |
| --- | --- | --- | --- |
| **3a** | **3b** |
| Bond distance/Å | — | | |
| 1Au-1Ge | 2.4475(4) | 2.4371(7) | 2.44752 |
| 1Au -2Ge | 2.4146(4) | 2.4089(8) | 2.41041 |
| 2Au -1Ge | 2.4460(5) | 2.4307(8) | 2.44057 |
| 2Au -P | 2.3298(11) | 2.311(2) | 2.37245 |
| Bond Angle/deg | — | | |
| 1Au -1Ge - 2Au | 106.909(16) | 107.61(3) | 100.02468 |
| 1Ge - 1Au-2Ge | 168.042(15) | 171.73(3) | 169.67871 |
| 1Ge - 2Au -P | 175.25(3) | 174.02(7) | 174.01159 |
| Dihedral Angle/deg | — | | |
| between two averaged 5-membered ring planes | 78.915 | 84.588 | 82.522 |

**Table S3.** Comparison of Frontier MO Energy Levels among **1**, **3a**, and **4**

| Compound | HOMO/eV | LUMO/eV |
| --- | --- | --- |
| **1** | ‒5.54 | ‒1.86 |
| **3a** | ‒4.47 | ‒2.32 |
| **4** | ‒4.51 | ‒0.56 |


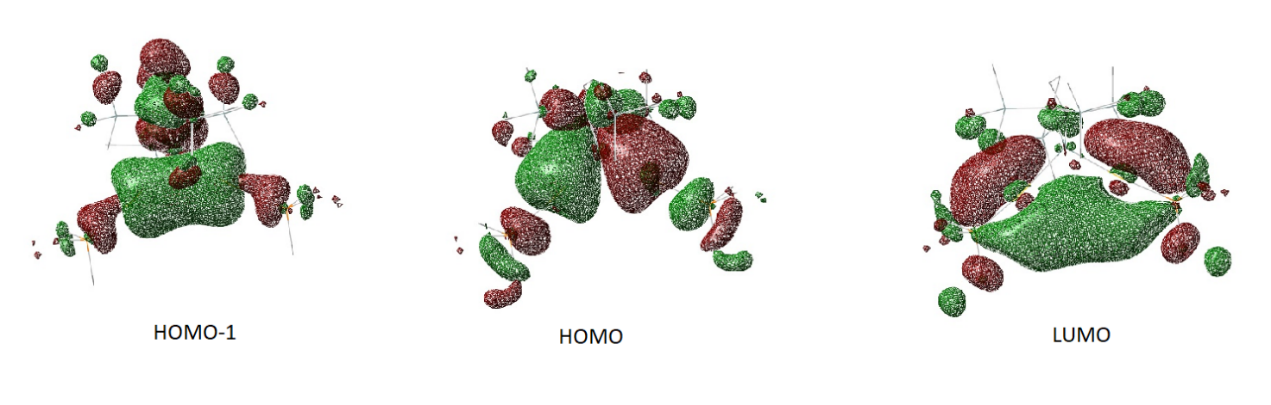


**Figure S53.** Frontier MOs of R’2Ge(AuPMe3)2 (**4**)

| 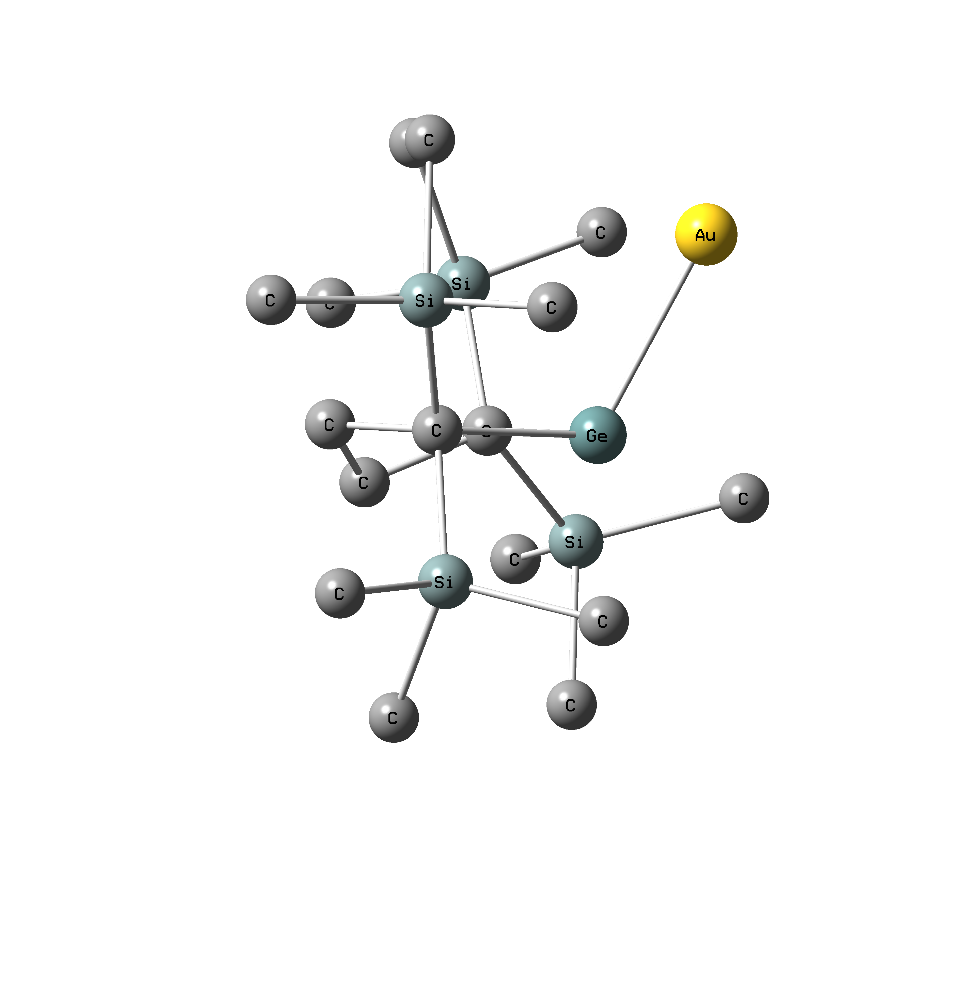 | 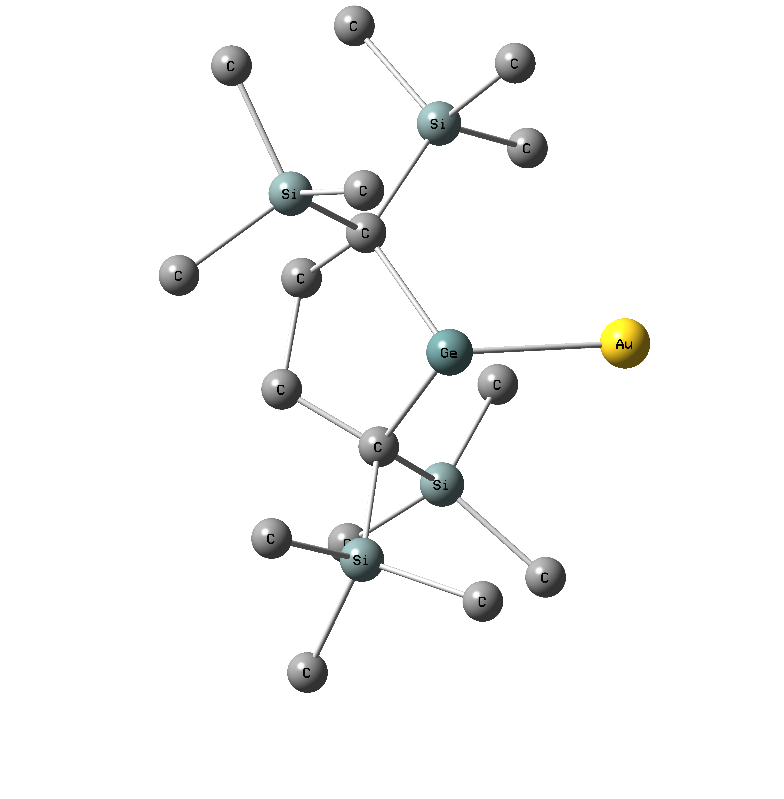 |
| --- | --- |

**Figure S54.** Optimized structure of **A**. Hydrogen atoms are omitted for clarity. View from the sideways (left) and top (right).

**XYZ Coordinates**

**1**

C 0.67885300 0.35628800 1.66802800

C -0.67884100 -0.35625800 1.66805100

C -1.41466400 -0.06243000 0.33509100

Ge -0.00001700 -0.00000800 -1.05156800

C 1.41464000 0.06242900 0.33504100

Si 2.43744800 1.55416900 -0.26633400

C 3.54347300 1.12450300 -1.73627700

C 3.44418000 2.28009700 1.15617300

C 1.30171400 2.94699000 -0.88221100

Si 2.46901700 -1.51873600 0.39010000

C 4.21785400 -1.21275000 1.05275200

C 2.56524800 -2.33825200 -1.30998100

C 1.75818500 -2.77738000 1.61247000

Si -2.43741800 -1.55417300 -0.26632600

C -3.44444400 -2.27998400 1.15603400

C -1.30167200 -2.94712500 -0.88193900

C -3.54319700 -1.12448200 -1.73644200

Si -2.46902300 1.51873300 0.39012800

C -4.21790700 1.21279900 1.05267800

C -2.56525300 2.33827900 -1.30994700

C -1.75813800 2.77732400 1.61250700

H 1.26891200 0.07539600 2.55255700

H 0.49446600 1.43400400 1.76038300

H -1.26887700 -0.07533300 2.55258200

H -0.49446500 -1.43397200 1.76042500

H 2.93244400 0.81331400 -2.59136600

H 4.10378200 2.01779300 -2.03645800

H 4.26452500 0.32902300 -1.53196100

H 2.78203300 2.60617200 1.96604000

H 4.00424400 3.15646200 0.80959700

H 4.15512400 1.56186600 1.57237400

H 0.86819200 2.72169000 -1.86366100

H 0.48349600 3.15350200 -0.18698000

H 1.88342400 3.87085300 -0.98278300

H 4.17346500 -0.81107000 2.07143200

H 4.74840000 -2.17144600 1.09942000

H 4.81765800 -0.52927400 0.44621300

H 1.65201000 -2.90398200 -1.52503900

H 3.40489300 -3.04185000 -1.34520700

H 2.70158900 -1.60740700 -2.11229100

H 1.63975500 -2.34735700 2.61283600

H 0.79291800 -3.18565000 1.30426800

H 2.45990100 -3.61576000 1.69676500

H -4.15604000 -1.56197700 1.57150900

H -4.00379500 -3.15685700 0.80959300

H -2.78252700 -2.60526200 1.96641200

H -0.86881800 -2.72237200 -1.86380900

H -1.88324600 -3.87117900 -0.98153600

H -0.48297800 -3.15303600 -0.18709800

H -4.26443300 -0.32916600 -1.53212400

H -2.93205000 -0.81302700 -2.59134900

H -4.10328800 -2.01781200 -2.03691000

H -4.17363300 0.81088700 2.07127000

H -4.74836400 2.17153500 1.09950100

H -4.81772500 0.52950900 0.44594000

H -1.65207200 2.90411600 -1.52496300

H -3.40497700 3.04178200 -1.34518900

H -2.70150700 1.60742800 -2.11226600

H -1.63953900 2.34725000 2.61283100

H -0.79295000 3.18566900 1.30416600

H -2.45992100 3.61563200 1.69694100

**3a**

| Zero-point correction= | 1.147218 (Hartree/Particle) |
| --- | --- |
| Thermal correction to Energy= | 1.234556 |
| Thermal correction to Enthalpy= | 1.235500 |
| Thermal correction to Gibbs Free Energy= | 1.020752 |
| Sum of electronic and zero-point Energies= | -8466.517605 |
| Sum of electronic and thermal Energies= | -8466.430268 |
| Sum of electronic and thermal Enthalpies= | -8466.429324 |
| Sum of electronic and thermal Free Energies= | -8466.644072 |

Au 0.58061800 -0.46377300 0.02986000

Ge -1.90055500 -0.73941900 0.12099700

Ge 2.99113300 0.18100000 -0.05191600

Au -2.68547800 1.57178000 -0.29233800

P -3.40641800 3.83229800 -0.73363600

C -2.59401000 -1.68302300 1.83334100

C -2.81284200 -2.11180700 -1.14046900

C 3.78833800 1.98754400 0.22098300

C 4.75274300 -0.69474800 -0.37767600

C -5.22847500 4.05848900 -0.69453200

C -2.94009900 4.51358700 -2.37471000

C -2.80314400 5.10803200 0.44182600

Si 3.69215900 2.62523000 2.04148700

C 3.85275100 4.51239800 2.14517900

C 5.14918500 2.00943500 3.08577600

C 2.09983100 2.08850800 2.89644200

Si 2.80044800 3.15406600 -0.96208600

C 1.13992000 3.70847400 -0.25391100

C 2.37725200 2.28407500 -2.59303100

C 3.84673000 4.66199800 -1.42126700

Si -1.58192200 -2.70487300 -2.48694600

C -0.20668000 -3.81326300 -1.80441900

C -0.70943600 -1.27992200 -3.38376100

C -2.37466000 -3.78630700 -3.84002400

Si -3.37210300 -0.40969900 3.04051100

C -2.26120100 1.08944200 3.38023700

C -5.02279300 0.30062400 2.43772600

C -3.82712300 -1.14755800 4.73727100

Si -1.27100200 -2.71132700 2.77839000

C -0.02115200 -3.69877400 1.75391700

C -0.18434200 -1.65505200 3.92066000

C -2.10059700 -4.05756300 3.83965900

Si 4.80428000 -2.20639900 0.83206300

C 3.91145400 -3.72977200 0.16876400

C 6.59480100 -2.63963400 1.26047800

C 3.94822700 -1.78548200 2.47060300

Si -4.41567700 -1.47843100 -1.99941100

C -5.63785800 -0.44124600 -0.98671600

C -5.49716300 -2.94600800 -2.55239700

C -4.07294200 -0.39917200 -3.52410000

Si 5.03767700 -1.27344600 -2.19815100

C 5.68369700 0.12929000 -3.29771500

C 6.40665100 -2.57983700 -2.31457400

C 3.46292800 -1.94623300 -2.98631200

C -3.65391400 -2.64258100 1.21813800

C -3.17881800 -3.23095100 -0.12367500

C 5.25991700 1.81136800 -0.25698600

C 5.78122800 0.39742000 0.04373000

H 0.59520700 -3.04381200 1.11979000

H -5.51549300 5.10270200 -0.89627100

H -5.60964600 3.76057700 0.29331000

H -5.69157300 3.40199400 -1.44568800

H -1.84436600 4.51878100 -2.46825000

H -3.32250000 5.53681100 -2.51733000

H -3.34363000 3.86212800 -3.16385900

H -1.70361300 5.12327700 0.42625200

H -3.18657200 6.11001600 0.19166400

H -3.12328000 4.84038600 1.45959500

H 4.81024600 4.85740400 1.72336400

H 3.04290400 5.06675800 1.64996900

H 3.84381500 4.79812200 3.21040100

H 5.15939400 0.92091300 3.23711200

H 6.12238700 2.30550000 2.66376900

H 5.07181000 2.47533600 4.08242000

H 2.07040000 0.99711900 3.04301400

H 1.19458800 2.36599200 2.33767400

H 2.03747000 2.55441000 3.89372700

H 0.47415700 2.84536400 -0.08795900

H 1.21610200 4.27447300 0.68533000

H 0.65754600 4.36222300 -0.99980900

H 3.26042600 1.90155200 -3.12490000

H 1.66801400 1.45141200 -2.45248700

H 1.88731500 3.00922000 -3.26444200

H 4.08627100 5.29871100 -0.55800700

H 4.79462200 4.36686900 -1.89816700

H 3.29116000 5.27649800 -2.14926000

H -0.58931700 -4.73865600 -1.34692300

H 0.41304200 -3.29077200 -1.06242100

H 0.44282900 -4.10602600 -2.64613100

H -0.15475900 -0.65496300 -2.66450500

H -1.39475600 -0.62706500 -3.94081700

H 0.01621000 -1.69882100 -4.10075400

H -2.84754100 -4.68705500 -3.41643500

H -3.12678800 -3.26343800 -4.44905400

H -1.57680700 -4.12563600 -4.52222900

H -2.02086500 1.61289700 2.44003200

H -2.80214900 1.79435100 4.03414800

H -1.31530500 0.83157800 3.87505600

H -5.79907700 -0.46890500 2.30625900

H -4.91927300 0.85060000 1.49174500

H -5.38564000 1.00557600 3.20480600

H -4.54450200 -1.97814700 4.63710200

H -2.96593500 -1.51296000 5.31568600

H -4.31771000 -0.36256200 5.33747800

H -0.48764000 -4.45783000 1.11034200

H 0.64789900 -4.22446900 2.45628100

H 0.31743200 -0.85489600 3.35373600

H 0.59725100 -2.29971800 4.35535400

H -0.73176800 -1.19124200 4.75384700

H -2.90766600 -3.69022900 4.48799300

H -2.51429800 -4.85974400 3.20713400

H -1.33553200 -4.52038000 4.48575800

H 2.84825700 -3.52038000 -0.02405200

H 4.35057100 -4.14455300 -0.74957300

H 3.95158700 -4.51735800 0.93930100

H 7.11991000 -1.79128500 1.72673600

H 7.17974800 -2.96228000 0.38762100

H 6.59552100 -3.46702200 1.98959200

H 4.37745700 -0.90603300 2.97265400

H 2.86441900 -1.62212100 2.35014300

H 4.06435500 -2.63828800 3.16028400

H -5.19653000 0.50936300 -0.65131000

H -6.49463000 -0.20978700 -1.64281100

H -6.03058100 -0.96599400 -0.10433900

H -4.96364500 -3.71208600 -3.13066200

H -5.96146000 -3.44121100 -1.68402100

H -6.31921600 -2.56301100 -3.18053400

H -3.44485700 0.46711100 -3.25991200

H -5.03513700 -0.01467000 -3.90161600

H -3.58570200 -0.93727000 -4.35005300

H 6.62299300 0.56136900 -2.91842000

H 4.96506600 0.94773500 -3.44395800

H 5.89997700 -0.29477200 -4.29259500

H 7.36406100 -2.19286300 -1.93063100

H 6.18357100 -3.51914500 -1.78925000

H 6.55741000 -2.82549100 -3.37912500

H 3.02226300 -2.77756500 -2.41792100

H 2.68875300 -1.16852800 -3.08298600

H 3.68719400 -2.31497000 -4.00091700

H -3.91245300 -3.46636200 1.90763200

H -4.59959600 -2.10364100 1.03967300

H -3.95480100 -3.91068800 -0.51963200

H -2.30222900 -3.87124600 0.07289800

H 5.93368000 2.56065800 0.19650600

H 5.33055900 1.98366500 -1.34442900

H 6.76054300 0.24940900 -0.44643700

H 5.98965800 0.32726200 1.12467100

**4**

C 0.19451300 -3.18867000 -0.74104000

C -0.19463200 -3.18539700 0.75451600

C 0.30805000 -1.89477700 1.45802400

Ge -0.00001500 -0.49568900 0.00086700

C -0.30802700 -1.90107300 -1.45019200

Au 1.90631300 1.00632200 -0.21936100

Au -1.90643200 1.00714500 0.21498300

Si 0.70819100 -1.37791100 -2.96493700

C 0.43320500 0.45517100 -3.39975700

C 0.32852400 -2.37544400 -4.54073700

C 2.56943600 -1.63861000 -2.74489000

Si -2.13057000 -2.07751700 -1.96570500

C -2.39051800 -3.73771000 -2.85610900

C -2.70237000 -0.66724600 -3.09566600

C -3.46267600 -2.13746500 -0.61887400

Si -0.70810200 -1.36493600 2.97047400

C -0.32846600 -2.35554200 4.55064100

C -2.56934300 -1.62667500 2.75155700

C -0.43293700 0.46999500 3.39724800

Si 2.13063600 -2.06900200 1.97417300

C 2.39081600 -3.72517500 2.87193100

C 2.70257800 -0.65387300 3.09801200

C 3.46249700 -2.13482400 0.62736500

P -3.91083900 2.26927300 0.32709700

C -3.90564000 4.10338900 0.23661200

C -5.07757200 1.78403700 -1.00280000

C -4.86314600 1.92477900 1.85720600

P 3.91083300 2.26787700 -0.33597900

C 5.07725900 1.78716000 0.99582900

C 3.90588700 4.10230200 -0.25192800

C 4.86339200 1.91787100 -1.86468100

H -0.19052900 -4.10016100 -1.22062000

H 1.28776100 -3.25558300 -0.80813100

H 0.19029900 -4.09483800 1.23806300

H -1.28788400 -3.25190000 0.82190500

H -0.29165500 0.93498800 -2.73563800

H 1.37665900 1.00350600 -3.29690300

H 0.08139300 0.56905600 -4.43184600

H 0.52386700 -3.44401800 -4.39444500

H 0.99562200 -2.02456200 -5.33839900

H -0.70027900 -2.26439000 -4.89660400

H 2.83169400 -2.68641100 -2.56586500

H 3.06337000 -1.32520100 -3.67321700

H 2.96841800 -1.03787200 -1.92495700

H -2.43011800 -4.55313100 -2.12411200

H -3.35584700 -3.72252900 -3.37698100

H -1.61578100 -3.98094800 -3.58611900

H -3.76425200 -0.81544600 -3.32714200

H -2.15699800 -0.60035200 -4.04083000

H -2.59944300 0.29277200 -2.57734300

H -3.28399500 -2.90475800 0.13854200

H -3.57052900 -1.17706200 -0.10737100

H -4.41310600 -2.37304800 -1.11591600

H -0.52336700 -3.42481400 4.40893800

H 0.70022400 -2.24254700 4.90622400

H -0.99585100 -2.00145700 5.34664700

H -2.96827600 -1.03026300 1.92845600

H -3.06340000 -1.30847300 3.67818400

H -2.83149000 -2.67542900 2.57799500

H -1.37678800 1.01756900 3.29400800

H -0.07915300 0.58826400 4.42816600

H 0.29045900 0.94729500 2.72971700

H 2.42861700 -4.54411400 2.14377800

H 3.35703500 -3.70819000 3.39109300

H 1.61714200 -3.96434700 3.60440600

H 3.76456100 -0.80095600 3.32973500

H 2.15754100 -0.58325900 4.04310200

H 2.59932000 0.30404400 2.57588300

H 3.28419600 -2.90613700 -0.12605600

H 3.56945100 -1.17698700 0.11087700

H 4.41324900 -2.36712400 1.12533000

H -3.31049800 4.50366500 1.06194800

H -3.44174500 4.41616600 -0.70282800

H -4.92211700 4.50878000 0.29194500

H -4.64485900 2.03676600 -1.97440200

H -6.04587100 2.28342700 -0.88999900

H -5.21584500 0.69991600 -0.97107000

H -4.99972400 0.84402600 1.95182400

H -4.29261600 2.26959200 2.72383700

H -5.84060700 2.41891000 1.84224600

H 4.64442400 2.04342400 1.96644900

H 6.04567200 2.28596100 0.88141300

H 5.21531900 0.70290300 0.96799600

H 3.44175600 4.41843300 0.68627200

H 4.92244900 4.50732600 -0.30836200

H 3.31106600 4.49979500 -1.07883900

H 5.84086600 2.41202100 -1.85130300

H 4.99996300 0.83677900 -1.95538000

H 4.29303700 2.25958700 -2.73265000

**A**

C -0.93625700 1.33510300 1.76006100

C 0.39255200 2.02039000 1.38123700

C 1.30252400 1.07643900 0.55336900

Ge -0.07156700 0.26296400 -0.82675000

C -1.63315700 0.69520800 0.52878600

Au 0.42565900 -2.17797100 -0.88572600

Si -2.70661000 -0.76827800 1.05653600

C -3.62433700 -1.53842700 -0.41044700

C -3.98507400 -0.25440500 2.38625300

C -1.83181300 -2.19588800 1.93120100

Si -2.68579100 1.93667200 -0.45542900

C -4.44580700 2.21211300 0.23095100

C -1.98441700 3.70091300 -0.44673300

C -2.93572000 1.46694800 -2.27645100

Si 2.45333600 1.97341900 -0.65146700

C 3.98571500 2.78371900 0.15206900

C 3.09733800 0.82369300 -2.02227000

C 1.61646400 3.43839200 -1.52462800

Si 2.32982500 -0.04400500 1.67620800

C 3.14164000 0.99705000 3.06099900

C 1.43658200 -1.38303800 2.66392400

C 3.71927100 -0.96231900 0.77217200

H -1.58223600 2.06552400 2.27844200

H -0.71665700 0.55749400 2.50601700

H 0.88592600 2.38834500 2.29530100

H 0.15330400 2.92008100 0.80211200

H -4.17113200 -2.42861000 -0.07617800

H -2.89490500 -1.85142900 -1.16714700

H -4.34151900 -0.85568100 -0.87784900

H -4.29409600 -1.14364900 2.94989600

H -3.53263100 0.44665900 3.09869800

H -4.88428500 0.21571400 1.98145200

H -1.04967000 -2.64478300 1.31180300

H -1.39472800 -1.89242200 2.88684600

H -2.59350400 -2.95960000 2.13780700

H -4.89072700 3.05701900 -0.31098100

H -5.09682300 1.34412300 0.08624700

H -4.43895600 2.46016700 1.29786400

H -2.69622600 4.35493900 -0.96700900

H -1.02423300 3.77322200 -0.96093600

H -1.86067300 4.08397200 0.57282700

H -3.06135000 0.38908000 -2.41274800

H -3.82841100 1.97446600 -2.66653400

H -2.06961600 1.76582800 -2.87447700

H 4.53642600 3.33897000 -0.61882700

H 3.69506200 3.49546200 0.93406400

H 4.67229800 2.05505100 0.59535600

H 2.58625000 1.05384000 -2.96331900

H 2.90054700 -0.22967000 -1.80342600

H 4.17707100 0.95228000 -2.17075300

H 1.28642300 4.21549100 -0.82636000

H 2.34431400 3.89177400 -2.20998900

H 0.75681600 3.10358100 -2.11411500

H 3.87642700 0.37748900 3.59144500

H 3.65028400 1.89460200 2.69992200

H 2.38882900 1.30922300 3.79512700

H 2.17876300 -1.88699000 3.29755500

H 0.98146500 -2.12555400 2.00497800

H 0.66211700 -0.97089300 3.31817700

H 3.28560200 -1.65087000 0.03804700

H 4.42780800 -0.30708300 0.25668000

H 4.27606200 -1.55692100 1.50748700

**MeOTf**

| Zero-point correction= | 0.067515 (Hartree/Particle) |
| --- | --- |
| Thermal correction to Energy= | 0.076902 |
| Thermal correction to Enthalpy= | 0.077846 |
| Thermal correction to Gibbs Free Energy= | 0.031682 |
| Sum of electronic and zero-point Energies= | -1000.399501 |
| Sum of electronic and thermal Energies= | -1000.390114 |
| Sum of electronic and thermal Enthalpies= | -1000.389170 |
| Sum of electronic and thermal Free Energies= | -1000.435334 |

C 2.25154700 1.20404900 -0.04399100

O 1.42560700 0.26684000 -0.75210300

S 0.41764200 -0.69612500 0.05587600

O 0.80971800 -0.78329600 1.44938800

O 0.17662500 -1.84423200 -0.78224800

C -1.12491800 0.35603300 -0.00416700

F -1.51524600 0.51951500 -1.25406900

F -2.07710700 -0.24445400 0.68691800

F -0.86759800 1.54226700 0.53671200

H 1.73186500 2.16795700 0.05010100

H 2.51257400 0.81520800 0.94933200

H 3.15746700 1.32390100 -0.65084000

**Int1**

| Zero-point correction= | 1.216578 (Hartree/Particle) |
| --- | --- |
| Thermal correction to Energy= | 1.314095 |
| Thermal correction to Enthalpy= | 1.315039 |
| Thermal correction to Gibbs Free Energy= | 1.079982 |
| Sum of electronic and zero-point Energies= | -9466.913291 |
| Sum of electronic and thermal Energies= | -9466.815773 |
| Sum of electronic and thermal Enthalpies= | -9466.814829 |
| Sum of electronic and thermal Free Energies= | -9467.049886 |

Au 0.24960100 -1.21585300 0.61926700

Ge -2.19203500 -1.05161100 0.46694900

Ge 2.73038000 -0.77813100 0.22554400

Au -0.96381700 0.62343000 -1.15415700

P -1.11596700 2.20146000 -2.99648100

C -3.44423800 -0.41124500 1.90522300

C -3.53069400 -2.26965000 -0.43875800

C 4.02529200 -1.68449700 -1.00338900

C 4.11637600 0.37885600 1.07747500

C -2.37590600 3.51350800 -2.85528400

C -1.54478600 1.35286600 -4.56917400

C 0.42194600 3.08684300 -3.42433900

Si 3.70272100 -1.30516900 -2.87024000

C 4.66133500 -2.47598700 -4.01113800

C 4.31803700 0.41465700 -3.35808900

C 1.86902400 -1.40578000 -3.31178500

Si 4.00726700 -3.59684200 -0.69294400

C 2.63997700 -4.51772000 -1.60842200

C 3.77796700 -3.99372600 1.14253900

C 5.67421400 -4.35061800 -1.17790300

Si -2.82056500 -4.04452300 -0.74587500

C -2.52525700 -5.01245000 0.84875800

C -1.15978700 -4.00250800 -1.64160000

C -4.00093400 -5.15412200 -1.73293500

Si -3.29359700 1.53083900 2.06966800

C -1.50916500 2.04372400 2.32448300

C -3.92540400 2.38557900 0.51603300

C -4.32212100 2.26338500 3.48032600

Si -3.25007500 -1.20227600 3.67472600

C -3.16394000 -3.09422100 3.75191800

C -1.74579600 -0.56482300 4.62144500

C -4.80002200 -0.86239100 4.71573500

Si 3.37896100 2.17770700 1.02925500

C 2.07222100 2.42484400 2.35195800

C 4.72603200 3.49715100 1.15958400

C 2.60658700 2.44134400 -0.67199600

Si -4.25578300 -1.62360300 -2.12322300

C -4.57796000 0.23334000 -2.23650500

C -5.96995400 -2.38048300 -2.42026300

C -3.15742400 -2.02426600 -3.61116100

Si 4.65962100 -0.08891900 2.87256500

C 6.11168600 -1.30957200 2.89126000

C 5.34010700 1.39316700 3.83409900

C 3.24718400 -0.83918800 3.87361600

C -4.80309600 -0.88673000 1.30861700

C -4.67346100 -2.25908300 0.62463600

C 5.40851000 -1.12796200 -0.53950700

C 5.29354700 0.27680200 0.06467800

H -2.34254100 -3.55255500 3.18893100

H -2.33558100 4.15273400 -3.75139900

H -2.18252200 4.12014500 -1.95778500

H -3.37689400 3.06750900 -2.77674100

H -0.78647700 0.59151200 -4.80263900

H -1.59003900 2.08029400 -5.39505700

H -2.51908900 0.85425600 -4.47882200

H 1.24003200 2.37361900 -3.59398300

H 0.26124600 3.68633700 -4.33391800

H 0.66726200 3.74150600 -2.57853200

H 5.74684300 -2.41508000 -3.83435500

H 4.36130200 -3.53081200 -3.93524300

H 4.48328300 -2.15675000 -5.05171700

H 3.78053800 1.22506300 -2.84769500

H 5.39502600 0.54339200 -3.16742400

H 4.16364200 0.54224100 -4.44269900

H 1.26809900 -0.67366500 -2.74674600

H 1.43894800 -2.39906200 -3.11986900

H 1.74408300 -1.18873600 -4.38577000

H 1.64176500 -4.15181100 -1.32980000

H 2.72764800 -4.46524400 -2.70314600

H 2.69174400 -5.58201000 -1.32466500

H 4.57181600 -3.56510000 1.77018800

H 2.80854000 -3.65462300 1.53667900

H 3.81555100 -5.08773300 1.27618000

H 5.91125200 -4.23486400 -2.24452700

H 6.50659900 -3.92525000 -0.59652400

H 5.64122700 -5.43104500 -0.95851500

H -3.42942200 -5.13412300 1.46283000

H -1.73664100 -4.57291000 1.47398600

H -2.18903500 -6.02229600 0.55959900

H -1.21823900 -3.64023200 -2.67578800

H -0.74471100 -5.02300100 -1.66595300

H -0.44529800 -3.36250700 -1.09990700

H -4.96564700 -5.28304300 -1.21687500

H -4.20396600 -4.81142100 -2.75737600

H -3.53584900 -6.15152300 -1.80642500

H -1.04389500 1.59321800 3.21000900

H -0.88967200 1.79963100 1.44760400

H -1.45185700 3.13835800 2.43360100

H -5.01771800 2.31997400 0.39222500

H -3.44735700 1.99506400 -0.39281100

H -3.64316600 3.44994100 0.58077300

H -5.38540600 1.98146400 3.43156900

H -3.93999200 2.02373100 4.48336800

H -4.26485600 3.35865300 3.36325200

H -4.10366200 -3.56607900 3.42697600

H -3.02154300 -3.36148200 4.81278400

H -0.81174000 -0.67130400 4.04933700

H -1.64218900 -1.15914800 5.54409400

H -1.84632700 0.48938000 4.91751700

H -5.04516900 0.19749700 4.85057400

H -5.68733400 -1.36983600 4.30492500

H -4.62067000 -1.29442000 5.71488100

H 1.33162100 1.61171100 2.33378200

H 2.48992900 2.48102600 3.36810400

H 1.52020500 3.35935100 2.15490300

H 5.54297300 3.32733600 0.44048000

H 5.16228400 3.59524600 2.16247800

H 4.25792500 4.46279800 0.90377600

H 3.36453800 2.69119800 -1.42969400

H 2.01323200 1.58250200 -1.03450900

H 1.89096200 3.27519600 -0.59487300

H -3.65797800 0.82623600 -2.13786000

H -5.00979400 0.43906200 -3.23069300

H -5.29439300 0.59703000 -1.48702400

H -6.02358000 -3.46903100 -2.28934100

H -6.72693100 -1.92002300 -1.76575300

H -6.26480500 -2.15410900 -3.45886100

H -2.14273600 -1.61364000 -3.49355000

H -3.60811400 -1.55728200 -4.50246400

H -3.06925800 -3.09997400 -3.81853700

H 6.98940600 -0.91524300 2.35529500

H 5.87936100 -2.30106500 2.47905100

H 6.41449300 -1.45677900 3.94145800

H 6.21591900 1.83721000 3.33614000

H 4.60512500 2.19056600 4.01204100

H 5.67392800 1.02558000 4.81900300

H 2.33695800 -0.22216500 3.84141100

H 2.99074700 -1.84839800 3.51594500

H 3.55025600 -0.93461700 4.92909500

H -5.58544700 -0.93840800 2.08442000

H -5.17313400 -0.15523400 0.57039400

H -5.64146200 -2.54093800 0.17869600

H -4.47484000 -3.01671100 1.39886100

H 6.13973200 -1.11939300 -1.36778400

H 5.84757300 -1.79271400 0.22298100

H 6.25447300 0.55805800 0.53086300

H 5.14884800 1.00077600 -0.75595800

C 0.34064400 -2.79045800 2.06127700

H 1.14980900 -2.55613000 2.76359100

H -0.58766600 -2.90769200 2.62744900

H 0.56229800 -3.72441400 1.52657100

O -0.16676100 3.90398900 -0.49408800

S -0.68782500 5.07018700 0.27575100

O -2.10794300 5.36481200 0.00997400

O -0.25134600 5.13405100 1.67796800

C 0.21280400 6.49269500 -0.52273700

F -0.04281700 6.53536300 -1.83714600

F -0.15069600 7.65458900 0.00816200

F 1.53504000 6.35804300 -0.37271500

**Int2**

| Zero-point correction= | 1.215263 (Hartree/Particle) |
| --- | --- |
| Thermal correction to Energy= | 1.313198 |
| Thermal correction to Enthalpy= | 1.314142 |
| Thermal correction to Gibbs Free Energy= | 1.076738 |
| Sum of electronic and zero-point Energies= | -9466.942465 |
| Sum of electronic and thermal Energies= | -9466.844530 |
| Sum of electronic and thermal Enthalpies= | -9466.843586 |
| Sum of electronic and thermal Free Energies= | -9467.080990 |

Au -0.81025900 0.24707700 -0.26814500

Ge 2.60124500 0.83688000 0.61438900

Ge -3.03463400 0.94432000 0.20130500

Au 1.58328300 -0.49051000 -1.26388500

P 1.01738300 -1.76104300 -3.30600300

C 3.52947900 -0.25244000 2.06716100

C 4.34993600 1.66768700 -0.09842200

C -4.10807600 2.37290500 -0.63428400

C -4.38812600 0.34333100 1.47918400

C -0.74302000 -1.88012100 -3.76338500

C 1.60409600 -3.48978500 -3.32435200

C 1.79951600 -1.00896100 -4.78984700

Si -4.65496900 2.03162000 -2.46254600

C -5.12371900 3.62785900 -3.36601400

C -6.21973400 0.97494600 -2.53839200

C -3.30416700 1.15170200 -3.43963300

Si -3.04037400 3.98645800 -0.51906200

C -1.70926900 4.06572900 -1.85273200

C -2.14635400 4.06929300 1.14862800

C -4.14075600 5.52040400 -0.58301100

Si 4.22228400 3.58348000 -0.27502000

C 4.29933300 4.50886300 1.37668500

C 2.62401100 4.11450700 -1.16024100

C 5.67240500 4.37052900 -1.22198000

Si 2.86027100 -2.06363400 2.07662800

C 0.96913900 -2.08938000 2.17941700

C 3.38394700 -3.03297100 0.53952700

C 3.55541400 -3.11929200 3.49566700

Si 3.42487500 0.42221500 3.87959300

C 3.53919500 2.29403100 4.17650000

C 1.83044500 -0.07342500 4.77628100

C 4.90590600 -0.23226700 4.87552700

Si -4.46934100 -1.58718500 1.15732600

C -3.08139100 -2.49296100 2.02987900

C -6.15828900 -2.25741000 1.66944800

C -4.31888800 -1.89210000 -0.70294800

Si 4.97076700 0.96677800 -1.78126500

C 4.82354900 -0.90714600 -2.04858300

C 6.83888200 1.23754800 -1.99182200

C 4.06336500 1.73883900 -3.25650700

Si -4.04096500 0.73430000 3.34008700

C -4.65078900 2.46558500 3.81197800

C -5.00649600 -0.42155500 4.48240800

C -2.20407800 0.63133500 3.74832100

C 5.00256100 -0.16537800 1.57077600

C 5.33410500 1.23679400 1.03247300

C -5.32981600 2.44367000 0.33538900

C -5.65933200 1.06835400 0.94540700

H 2.64680100 2.84972000 3.85665500

H -0.85203200 -2.39789600 -4.72857200

H -1.18138700 -0.87531800 -3.82768600

H -1.24568900 -2.46692800 -2.98330300

H 2.65174700 -3.54552400 -2.99700100

H 1.51146200 -3.90893500 -4.33837900

H 0.96340100 -4.07546600 -2.64922300

H 2.89130600 -0.97840300 -4.66673100

H 1.55639600 -1.59529000 -5.69006500

H 1.43913000 0.02125300 -4.92503900

H -5.94791400 4.15591900 -2.86129700

H -4.29239500 4.33497600 -3.49854700

H -5.48207400 3.35009900 -4.37138900

H -6.07476600 -0.04353900 -2.15320200

H -7.06522400 1.43259500 -2.00160900

H -6.51734900 0.88534400 -3.59648000

H -3.14765300 0.12942600 -3.06255900

H -2.33972700 1.67876300 -3.40526700

H -3.60820900 1.06897400 -4.49603000

H -1.03032200 3.20049300 -1.78815900

H -2.11008600 4.11087000 -2.87565900

H -1.10190100 4.97204500 -1.69559900

H -2.84333400 4.11572700 1.99796300

H -1.44952000 3.23259700 1.31776300

H -1.54198800 4.99128200 1.17766200

H -4.63761300 5.66363300 -1.55196600

H -4.91660400 5.49540600 0.19820800

H -3.51394200 6.40766800 -0.39301000

H 5.26740000 4.36930800 1.88333800

H 3.50506500 4.24770000 2.08734600

H 4.20392800 5.58530800 1.15477700

H 2.83284900 4.93390800 -1.86693400

H 1.88448900 4.48753300 -0.43557700

H 2.15376600 3.29770400 -1.72662800

H 6.63519100 4.18240200 -0.72093000

H 5.76700700 4.05765500 -2.27156100

H 5.51272100 5.46216700 -1.21802400

H 0.62974300 -2.80869500 2.94154800

H 0.55101700 -1.10672500 2.44267900

H 0.52158800 -2.40429600 1.22303100

H 4.47469300 -3.15801100 0.45642700

H 3.01104200 -2.58577400 -0.39421400

H 2.93275600 -4.03512600 0.60964700

H 4.65390300 -3.19382300 3.45212000

H 3.27547100 -2.77551700 4.50188300

H 3.15435700 -4.13960900 3.37386800

H 4.42305900 2.76003800 3.71917700

H 3.63051000 2.43037600 5.26772000

H 0.94120200 0.38235700 4.31433400

H 1.89213000 0.30636500 5.80986500

H 1.65900000 -1.15749100 4.83076400

H 5.09035200 -1.30871300 4.76304300

H 5.83117000 0.30133000 4.60399600

H 4.72267900 -0.03361200 5.94482200

H -2.09697400 -2.08019900 1.76379400

H -3.17887500 -2.51009900 3.12501600

H -3.07840600 -3.52728500 1.65026500

H -6.98618800 -1.71549800 1.18596500

H -6.32349700 -2.24268200 2.75563500

H -6.21188800 -3.30735800 1.33597800

H -5.24699100 -1.66598900 -1.24810100

H -3.48123500 -1.35907600 -1.18746400

H -4.08177800 -2.96261100 -0.82995300

H 3.78742700 -1.28806700 -2.04378400

H 5.24702000 -1.13637300 -3.04142300

H 5.38723600 -1.49234400 -1.30797100

H 7.17886400 2.26613300 -1.81681900

H 7.40877600 0.57405900 -1.32158500

H 7.11662000 0.96456700 -3.02379700

H 2.98508700 1.51498400 -3.21879200

H 4.46221300 1.30553100 -4.18849100

H 4.17425000 2.83013700 -3.32690800

H -5.72334500 2.60605400 3.60503000

H -4.09729500 3.27893800 3.32192500

H -4.51279900 2.58871900 4.89919900

H -6.09105800 -0.35691300 4.30214000

H -4.70763400 -1.47606100 4.40213600

H -4.82668200 -0.10416200 5.52313000

H -1.76984600 -0.34168700 3.47775900

H -1.62971800 1.41663100 3.23130500

H -2.05580000 0.77633800 4.83079300

H 5.71865100 -0.43273400 2.36625100

H 5.17733700 -0.89798200 0.76482800

H 6.38363900 1.26377000 0.69036900

H 5.28292300 1.94773700 1.87430300

H -6.22264000 2.84670700 -0.17336100

H -5.12176400 3.14788100 1.15906400

H -6.41377900 1.19011400 1.74160400

H -6.14929400 0.45243300 0.17259900

C 1.36922900 2.18084900 1.38767800

H 0.67629800 1.66419000 2.06865000

H 1.89210500 2.96261100 1.95114500

H 0.78349700 2.65285200 0.58876600

O -0.88110200 -3.11855100 -0.61435200

S -1.41658100 -4.47560200 -0.91267600

O -2.76850200 -4.74629800 -0.39080700

O -1.15842400 -4.92384400 -2.29369900

C -0.34678400 -5.60645600 0.11380200

F -0.41410400 -5.28956700 1.40866300

F -0.72824200 -6.87165100 -0.02631400

F 0.93657800 -5.51733800 -0.26296900

**Me3PAuOTf**

| Zero-point correction= | 0.143633 (Hartree/Particle) |
| --- | --- |
| Thermal correction to Energy= | 0.159916 |
| Thermal correction to Enthalpy= | 0.160861 |
| Thermal correction to Gibbs Free Energy= | 0.096747 |
| Sum of electronic and zero-point Energies= | -1557.214192 |
| Sum of electronic and thermal Energies= | -1557.197908 |
| Sum of electronic and thermal Enthalpies= | -1557.196964 |
| Sum of electronic and thermal Free Energies= | -1557.261078 |

O 1.22607800 0.72079700 0.79924700

S 2.29023900 0.74793100 -0.32043300

O 1.68366800 0.56739300 -1.64057800

O 3.27175200 1.79498700 -0.10243900

C 3.17950400 -0.85204500 0.02818800

F 3.74127800 -0.82849000 1.22919900

F 2.32348600 -1.87478600 -0.02161600

F 4.12277100 -1.04629800 -0.88525200

Au -0.72518300 0.23512200 0.29322500

P -2.85043200 -0.27521400 -0.20409300

C -3.44946900 -1.81831700 0.56936800

C -3.11643000 -0.50823100 -1.99570900

C -4.06018000 1.00039500 0.29349700

H -3.38890900 -1.72735000 1.66347000

H -2.80718100 -2.65460100 0.25764900

H -4.49004200 -2.02653800 0.27614700

H -2.46403700 -1.31581500 -2.35795100

H -2.84175600 0.41444400 -2.52698400

H -4.16704600 -0.75845800 -2.20926200

H -3.80665700 1.95247300 -0.19469900

H -5.08210300 0.70443100 0.01031500

H -4.01050200 1.14799900 1.38195500

**5**

| Zero-point correction= | 1.070488 (Hartree/Particle) |
| --- | --- |
| Thermal correction to Energy= | 1.149142 |
| Thermal correction to Enthalpy= | 1.150086 |
| Thermal correction to Gibbs Free Energy= | 0.958034 |
| Sum of electronic and zero-point Energies= | -7909.733039 |
| Sum of electronic and thermal Energies= | -7909.654386 |
| Sum of electronic and thermal Enthalpies= | -7909.653442 |
| Sum of electronic and thermal Free Energies= | -7909.845494 |

Au -0.00009700 0.03375600 0.06302700

Ge -2.49059000 0.04385400 0.07073800

Ge 2.46710000 0.01884800 0.44359800

C -3.98827000 0.01842700 -1.23719800

C -3.67854300 0.10856100 1.65888600

C 3.67303800 1.40350400 -0.48449000

C 2.60577500 0.23729700 2.42040000

C 3.49770300 -1.58996700 -0.31627900

Si 2.60216800 2.76534800 -1.31704400

C 1.35719000 3.55962400 -0.12847500

C 1.58294600 2.11502400 -2.77444600

C 3.61136700 4.17969600 -2.09223700

Si -3.59182500 1.43988100 -2.49269400

C -5.18803100 2.09459900 -3.26535500

C -2.37739000 0.92723300 -3.84210600

C -2.78395400 2.90980400 -1.60781300

Si 2.53185400 -2.51330700 -1.70651600

C 1.53443300 -1.45944900 -2.92572800

C 1.25712600 -3.74228400 -1.02538000

C 3.72605700 -3.45086300 -2.85238500

Si -4.22741600 -1.66156300 -2.16271100

C -5.22303600 -1.44720800 -3.76103000

C -5.27270500 -2.88364600 -1.16019800

C -2.58250100 -2.49326100 -2.56005600

Si -3.06794600 -1.33498600 2.79872900

C -4.47354200 -1.93120500 3.91309400

C -2.53442200 -2.83198000 1.76333900

C -1.55561800 -0.87558400 3.82744700

Si -3.64459600 1.78870400 2.61548400

C -1.92507000 2.56280200 2.64184900

C -4.83743100 3.05354700 1.86090500

C -4.27179900 1.59828500 4.39354500

Si 3.99342700 -2.87039800 1.03154800

C 5.44085300 -2.31071900 2.12008800

C 2.57694800 -3.30800600 2.21407600

C 4.63918800 -4.51325600 0.31872000

Si 5.02384200 2.26841700 0.59375800

C 4.37958800 3.76391700 1.57004800

C 5.95025300 1.25579400 1.90293400

C 6.44165900 2.87264500 -0.52295000

C 4.37101600 0.48822300 -1.53591000

C 4.74089000 -0.87820200 -0.93295900

C -5.22688800 0.37033300 -0.35860700

C -5.08751100 -0.19035900 1.06581400

H 1.79879700 -0.32233800 2.91320600

H 2.46053600 1.30299400 2.65570000

H 3.56439300 -0.08537300 2.84529700

H 0.68412100 2.79730800 0.29700100

H 0.73854000 4.28148100 -0.68745500

H 1.82604500 4.09878600 0.70565500

H 0.99385800 2.95478000 -3.17931700

H 0.88104600 1.32507800 -2.47185200

H 2.20618200 1.72691400 -3.59471400

H 4.19670300 4.76694300 -1.36984100

H 2.90973800 4.87184500 -2.58779000

H 4.30226900 3.80718100 -2.86567700

H -5.71807600 1.33997900 -3.86326600

H -4.94066900 2.93786200 -3.93156300

H -5.88474400 2.47376600 -2.50138200

H -2.17524200 1.80478300 -4.47823000

H -2.74505600 0.12413800 -4.49629700

H -1.41391500 0.60791200 -3.41627800

H -3.39587600 3.31134900 -0.78678500

H -2.64541600 3.72733000 -2.33509900

H -1.78438100 2.66857600 -1.20936800

H 2.14963800 -0.74161600 -3.48626200

H 0.72334100 -0.90451100 -2.42973600

H 1.07638900 -2.14579400 -3.65806100

H 0.71638000 -4.19094900 -1.87482800

H 0.51508100 -3.22411900 -0.39696800

H 1.68925100 -4.56326200 -0.43573100

H 4.29190500 -2.74997300 -3.48742300

H 3.13433900 -4.09005600 -3.52918800

H 4.44919000 -4.09378800 -2.33344100

H -6.22249400 -1.03044200 -3.55842600

H -5.37041700 -2.44441700 -4.20841600

H -4.73752100 -0.81627700 -4.51878500

H -5.43591000 -3.77775800 -1.78492700

H -6.26548300 -2.47837600 -0.90940700

H -4.79634800 -3.22193600 -0.22949800

H -1.91013900 -1.85090700 -3.14633100

H -2.76536900 -3.40959700 -3.14527000

H -2.04239000 -2.79058900 -1.64717900

H -4.81806300 -1.16295700 4.61939500

H -4.11937300 -2.79413300 4.50130200

H -5.34274800 -2.26834300 3.32675500

H -3.32859300 -3.21414600 1.10576300

H -2.25778900 -3.65291500 2.44592500

H -1.64438000 -2.62048300 1.14711300

H -1.23922700 -1.76305800 4.39998500

H -1.72615200 -0.06147800 4.54589800

H -0.71557000 -0.58882500 3.17479500

H -1.93685200 3.46305600 3.27832300

H -1.60457000 2.87779800 1.63615000

H -1.15465500 1.88410700 3.03497800

H -4.56233700 3.37529800 0.84659600

H -4.82589100 3.95176800 2.50072700

H -5.87591500 2.68797300 1.83442100

H -4.28898000 2.59787200 4.85916200

H -3.64844600 0.95193800 5.02754300

H -5.30231300 1.20963500 4.41738900

H 5.63775400 -3.11514600 2.84876700

H 5.24649300 -1.39170800 2.68789500

H 6.36715400 -2.16459900 1.54231000

H 1.64183300 -3.56286300 1.69689100

H 2.36413400 -2.48400400 2.91012600

H 2.87430800 -4.18162300 2.81806000

H 3.90308400 -5.07842100 -0.27100700

H 4.94528200 -5.15277300 1.16385800

H 5.53030700 -4.35727200 -0.31019900

H 3.56571300 3.48947600 2.25908200

H 4.02586900 4.59158000 0.93865300

H 5.21066600 4.15029400 2.18326800

H 5.32838900 0.97644600 2.76436200

H 6.76142400 1.90114500 2.28144800

H 6.41991900 0.34636000 1.50403600

H 7.09192000 3.54103500 0.06619900

H 6.11557800 3.42484900 -1.41449300

H 7.06726300 2.02917300 -0.85723100

H 3.70233800 0.31543200 -2.39632000

H 5.27413300 0.96036300 -1.96015600

H 5.50999900 -0.71342300 -0.15961000

H 5.23090600 -1.49994100 -1.70325800

H -5.34558600 1.46491000 -0.28999900

H -6.16665100 0.00757900 -0.81245100

H -5.26238400 -1.27895000 1.03080200

H -5.89593100 0.20956200 1.70375100

**References**

1. Sheldrick, G. M. *SHELXT*—Integrated space-group and crystal-structure determination. *Acta Crystallogr.* **A71**, 3–8 (2015).
2. Sheldrick, G. M. A short history of *SHELX*. *Acta Crystallogr.* **A64**, 112–122 (2008).
